# Supplementary material for: Physiological and developmental disturbances caused by Botryosphaeria dieback in the annual stems of grapevine
Source: Front Plant Sci. 2024 Apr 23;15:1394821. doi: 10.3389/fpls.2024.1394821 (PMC11074360; doi:10.3389/fpls.2024.1394821)
Supplement: Supplementary File 1 — Climatic data (temperatures and rainfall) collected between 2010 and 2021. [file DataSheet_1.xlsx]

## Sheet: weather data 2010-2021
DATE	RAINFALL (mm)	MIN-T (°C)	MAX-T (°C)	MEAN-T (°C)
2010-01-01	0	7.2	13.7	8.5			MIN-T = Minimal Temperatures
2010-01-02	0	0.9	9.1	2.8			MAX-T = Maximal Temperatures
2010-01-03	3	-0.7	4.8	2.2			MEAN-T = Mean Temperatures
2010-01-04	2.5	-0.3	4.1	2.9
2010-01-05	0	1.5	5.9	3.1
2010-01-06	0.5	-1.4	6.6	0.7
2010-01-07	7	-5.2	3.9	-0.1
2010-01-08	6	-4.9	2.6	0.6
2010-01-09	0	-0.1	1.5	0.1
2010-01-10	1	-1.5	4.3	0
2010-01-11	0.5	-3.9	3.8	-0.9
2010-01-12	10.5	-5.1	3.7	0.2
2010-01-13	3	-4.6	9.4	3.5
2010-01-14	7	-0.5	8.7	6
2010-01-15	0	2.6	12.9	6.6
2010-01-16	1	0.4	8.2	4.9
2010-01-17	0	1.6	10.7	7.8
2010-01-18	0	5.4	12.3	7.4
2010-01-19	0	0	9.7	4.9
2010-01-20	1	-0.7	6.2	4.7
2010-01-21	0	2.7	13.1	6.9
2010-01-22	0	0.3	10.7	4.9
2010-01-23	0	-2.1	9.7	2.9
2010-01-24	0.5	0.5	9	4.9
2010-01-25	0	3.3	9.9	6.8
2010-01-26	0	4.2	8.3	5
2010-01-27	0	0.1	5.1	1.4
2010-01-28	0	-2.3	9.2	2.5
2010-01-29	0	-0.7	9.8	5.4
2010-01-30	0	0.1	7.5	4.4
2010-01-31	0	-2.8	6.9	1.9
2010-02-01	0	-3.5	8.9	1.9
2010-02-02	0	-4.7	10.6	1.8
2010-02-03	0	-4.6	11.7	2.2
2010-02-04	7.8	-4	11.9	6.7
2010-02-05	14	3.2	13.6	8.6
2010-02-06	0	2.4	13.6	7.7
2010-02-07	0	3.7	11.2	7
2010-02-08	6.8	2	11.2	6.3
2010-02-09	12.5	2.3	7.6	5.5
2010-02-10	0	2.3	5.4	2.3
2010-02-11	0	-2.6	0.9	-1.2
2010-02-12	0	-2.8	4.6	1
2010-02-13	0	-3.7	4.5	0.3
2010-02-14	0	-2.6	6.2	1.3
2010-02-15	0	-3	8.3	1.3
2010-02-16	10	-2.7	8.6	5
2010-02-17	11.5	1.8	10.4	8.7
2010-02-18	16.5	5	14.8	9.5
2010-02-19	7	4.4	10.1	7.5
2010-02-20	0	0.6	11.4	5.8
2010-02-21	7	-0.8	11.7	6.3
2010-02-22	1.5	-0.4	11.5	9.2
2010-02-23	0	7.2	16.2	11
2010-02-24	2.5	7.7	15.6	10
2010-02-25	0.5	6.2	14.7	11.3
2010-02-26	0	5	16	10.3
2010-02-27	0.5	0.5	13.2	7.9
2010-02-28	0	2.1	17.7	12.6
2010-03-01	0	0.6	16.1	8.4
2010-03-02	0	1.1	17.9	9
2010-03-03	12	3.9	8.1	7.1
2010-03-04	0	5.4	12.3	7.9
2010-03-05	0	4.1	10	6.4
2010-03-06	0	1.6	12.4	5.9
2010-03-07	28	1.5	5.6	0.9
2010-03-08	8	-0.9	3.1	1.6
2010-03-09	0.5	-1.9	3.7	0.8
2010-03-10	0	-1.4	6.2	1.6
2010-03-11	0	-2.7	7.5	2.1
2010-03-12	0	-1.9	10.2	4.5
2010-03-13	0	0.5	12.6	7
2010-03-14	0	3.1	14.3	8.3
2010-03-15	0	5	14.8	9.9
2010-03-16	0	6.7	18.7	11.9
2010-03-17	0	0.6	17.6	8.6
2010-03-18	0	3.7	13.5	9.7
2010-03-19	0	6.8	16.6	12.1
2010-03-20	0	9.8	16.4	13
2010-03-21	0	10.8	18.6	14
2010-03-22	0.8	11.3	17.2	13.1
2010-03-23	0	10.1	20.6	14
2010-03-24	0	9.4	19.1	13.4
2010-03-25	2.4	10.4	15.1	13.6
2010-03-26	8.9	12.5	19.1	13.4
2010-03-27	0	5.4	17.9	12.3
2010-03-28	0	8.3	19.6	12.8
2010-03-29	0	5.8	18.6	12.5
2010-03-30	22.6	4.7	14.9	10.5
2010-03-31	9.8	4.3	17.2	10.9
2010-04-01	0	5.2	15.8	9.6
2010-04-02	0	0.9	16.3	9.3
2010-04-03	27	6.7	15.4	11.4
2010-04-04	0.4	7.7	18.5	10.9
2010-04-05	0	4.7	18.4	11.6
2010-04-06	0	4.2	18	11.2
2010-04-07	6.8	7	14.1	9.7
2010-04-08	0	8.2	15.8	12
2010-04-09	0	10.8	22.2	15.2
2010-04-10	0	8	23.4	16.1
2010-04-11	0	12.9	20.4	14.6
2010-04-12	2.6	7.5	11.8	8.6
2010-04-13	0	1.8	18.4	10.5
2010-04-14	0	4.2	19.8	11.6
2010-04-15	0	3.7	20	12.5
2010-04-16	0	8.3	21.7	13.7
2010-04-17	0	4	20.2	12.7
2010-04-18	0	4.7	20.2	12.1
2010-04-19	0	5.1	24.6	14.2
2010-04-20	0	8.8	26	17
2010-04-21	0.2	9.3	26	16.8
2010-04-22	0	8.2	21.8	15.1
2010-04-23	0	12.7	20	15.1
2010-04-24	0	10.1	24.3	16.5
2010-04-25	0	9	27.4	18.3
2010-04-26	0	13.6	26.7	20.6
2010-04-27	0	14.7	26.7	19.3
2010-04-28	0	9	25.9	17.1
2010-04-29	0	8.1	24.2	16.7
2010-04-30	1.8	10.7	0	15
2010-05-01	14.2	10.5	20.5	15.5
2010-05-02	0	13.6	22.1	16.5
2010-05-03	12	7.9	19.7	13.1
2010-05-04	12.9	7.5	14.2	9.3
2010-05-05	2.2	6.7	15.5	9.6
2010-05-06	0.2	6.6	16.7	10.9
2010-05-07	1	3.8	18.8	11.2
2010-05-08	11	7.9	16.1	11.7
2010-05-09	6.2	10.2	19.5	14.8
2010-05-10	0	13.1	21	16.5
2010-05-11	0.8	13.5	23.1	16.4
2010-05-12	17.3	12.7	19	14
2010-05-13	15.7	9.7	21.1	13
2010-05-14	0	9.3	18.5	12.7
2010-05-15	0	8.8	0	13.4
2010-05-16	0	10.2	0	15.5
2010-05-17	0	11.5	22	16.6
2010-05-18	0	12.2	24.6	17.8
2010-05-19	0	12.5	22.4	16.9
2010-05-20	0	11.4	23.3	17.9
2010-05-21	0	14.5	27.1	20.4
2010-05-22	0	15.4	28	20.3
2010-05-23	0	11.5	28.8	19.8
2010-05-24	0	10.3	29.5	19.8
2010-05-25	0	10.6	24.8	18.7
2010-05-26	0	11	24.7	18.7
2010-05-27	3.6	14.1	27.9	20.2
2010-05-28	0	13.6	27.4	19.8
2010-05-29	0	15	29.2	21.9
2010-05-30	0	16.1	0	21.8
2010-05-31	0	0	25.3	18.9
2010-06-01	0	14.3	26.8	19.3
2010-06-02	0	14.1	26.4	20.4
2010-06-03	0	16	29.3	21.9
2010-06-04	0	15.2	32.3	22.4
2010-06-05	0	14.7	30.5	22.6
2010-06-06	1.6	16.6	25.7	20.6
2010-06-07	0	15.8	31.5	21.7
2010-06-08	0	16.1	25.4	19.8
2010-06-09	0	13.8	0	21.7
2010-06-10	0	18.6	27.4	21.7
2010-06-11	7.7	16.2	25.8	18.5
2010-06-12	0	10.7	27.9	19.3
2010-06-13	14.7	12.1	31.7	21
2010-06-14	1.4	14	28	19.1
2010-06-15	13.1	13.9	23.1	16.9
2010-06-16	5.8	14.9	24.7	19.1
2010-06-17	0	13.6	26.8	18.8
2010-06-18	0	13.5	29.2	20.7
2010-06-19	0	13.7	25.5	18.5
2010-06-20	0	10.4	19.5	15.9
2010-06-21	0	13.9	22.9	18.1
2010-06-22	0	13.5	26.8	20
2010-06-23	0	14.5	30.9	21.9
2010-06-24	0	12.2	32.2	22.7
2010-06-25	0	13.7	32.2	23.6
2010-06-26	0	13.9	34.3	24
2010-06-27	0	15.8	32.8	24.1
2010-06-28	0	16.3	36.9	25.8
2010-06-29	0	19	36.6	27.5
2010-06-30	0	22	36.4	27.5
2010-07-01	0	18.2	33.8	25.8
2010-07-02	0	17.5	32.6	25
2010-07-03	0	16.8	34.7	25.6
2010-07-04	0	20.3	35.3	28
2010-07-05	0	22.1	34.6	28.4
2010-07-06	0	22.1	33.9	27
2010-07-07	0	19.6	36.7	26.6
2010-07-08	0	15.7	35.4	26.1
2010-07-09	0	18.5	31.8	25.3
2010-07-10	0	20.2	34.7	26.3
2010-07-11	0	19.9	36.7	26.7
2010-07-12	0	20.3	33.7	26.6
2010-07-13	0	19.4	33.9	25.9
2010-07-14	0	17.8	32.3	25.6
2010-07-15	0	19.6	36.9	27.3
2010-07-16	0	17.8	34.5	26.6
2010-07-17	0	19.2	34.8	26
2010-07-18	0	19.9	32.9	25.6
2010-07-19	0	16.6	36.3	26.2
2010-07-20	0	16.1	34.8	25.5
2010-07-21	0	18.3	32	24.1
2010-07-22	1	17.2	32.2	24.1
2010-07-23	0	18.4	30.3	23.2
2010-07-24	0	15.9	29.6	23.2
2010-07-25	0	19.5	29.9	24.1
2010-07-26	0	20.6	30.4	24.9
2010-07-27	0	19	32.7	25.3
2010-07-28	0	16.1	36.7	26.1
2010-07-29	4.5	20.7	31.7	24.1
2010-07-30	0	17	30.3	23.5
2010-07-31	0	17.3	33.1	24
2010-08-01	7	13.8	31.3	22.5
2010-08-02	0.5	17.5	29.6	22.2
2010-08-03	0	17.2	31.2	23.9
2010-08-04	0	17.1	33.4	25
2010-08-05	0	18	27.5	22.2
2010-08-06	0	15.2	29.7	22.7
2010-08-07	0	17.7	34.7	24.5
2010-08-08	0	13.6	35.1	24.6
2010-08-09	0	16.1	33	24.5
2010-08-10	0	17.7	34.4	24.9
2010-08-11	0	16.2	36.9	25.6
2010-08-12	0	18.5	34.7	25.3
2010-08-13	0	17	31.7	23.7
2010-08-14	0	17.3	28.7	21.9
2010-08-15	0	13.7	28.5	20.7
2010-08-16	0	11.8	31	21
2010-08-17	0	13.5	33.1	22.2
2010-08-18	0	12.3	32.6	22.6
2010-08-19	3	15.1	32.2	23.7
2010-08-20	0	19.5	32.3	24.7
2010-08-21	0	18.5	38.6	28.2
2010-08-22	0	17.4	35.4	26.2
2010-08-23	0	17	28.6	23.5
2010-08-24	0	20.4	35.1	27.5
2010-08-25	0	18.8	36.6	25.4
2010-08-26	0	16	33.7	25.5
2010-08-27	0	24.2	34.3	26.9
2010-08-28	0	19.8	28.5	23.1
2010-08-29	0	17	27.9	21.7
2010-08-30	0	16.2	26.2	20
2010-08-31	0	15	25.6	20.1
2010-09-01	0	12.5	28	19.4
2010-09-02	0	11.3	28.9	19.1
2010-09-03	0	11.3	32.6	21.5
2010-09-04	0	12.5	32.9	23.2
2010-09-05	0	19.1	34.1	23.8
2010-09-06	83	12.8	27.8	20.9
2010-09-07	1	17.3	26.3	20.4
2010-09-08	1.5	14.8	26	19.3
2010-09-09	0.5	12.7	26.4	19.4
2010-09-10	0	15	27	20.4
2010-09-11	0	15.7	30.9	20.9
2010-09-12	0	12.9	32.3	21.6
2010-09-13	1	16.5	25.4	20.1
2010-09-14	0	15.8	27.8	20.3
2010-09-15	0	11.8	0	20.6
2010-09-16	4	11.5	29.6	19.6
2010-09-17	0.5	15.9	25.4	18.5
2010-09-18	0	14.25	21.05	17.88
2010-09-19	0	10.45	13.35	11.62
2010-09-20	0			0
2010-09-21	0	14.05	22.85	19.17
2010-09-22	0	13.65	16.05	15.12
2010-09-23	5.4677768327184	12.15	24.75	20.03
2010-09-24	1.0380047720567	15.85	17.25	16.67
2010-09-25	0	10.75	20.85	16.76
2010-09-26	0	10.25	12.05	10.92
2010-09-27	0	7.15	19.75	14.72
2010-09-28	0	7.35	9.75	8.4
2010-09-29	0	11.35	21.95	17.21
2010-09-30	0	10.65	13.45	12.57
2010-10-01	0	11.45	23.25	17.43
2010-10-02	0	8.15	10.75	9.63
2010-10-03	0	13.95	23.95	20.81
2010-10-04	2.3073533198596	19.45	21.35	20.48
2010-10-05	0.077058177848735	11.75	23.75	18.01
2010-10-06	0	11.55	11.95	11.78
2010-10-07	0.4	12.15	24.85	19.34
2010-10-08	0.077058177848735	14.75	15.55	15.13
2010-10-09	0	12.45	24.15	19.68
2010-10-10	22.102097267471	17.05	17.25	17.15
2010-10-11	7.1218931884159	13.85	16.45	15.14
2010-10-12	0	12.85	14.55	14.05
2010-10-13	0	13.05	20.65	16.52
2010-10-14	0	9.15	12.45	10.6
2010-10-15	0	9.65	17.65	13.61
2010-10-16	0	7.65	9.55	8.95
2010-10-17	0	7.35	13.85	11.57
2010-10-18	0	9.75	10.35	10.15
2010-10-19	0	7.05	17.65	12.97
2010-10-20	0	9.75	11.55	10.92
2010-10-21	0	6.15	15.25	10.89
2010-10-22	0	4.65	5.45	4.98
2010-10-23	0.2	10.35	16.65	13.47
2010-10-24	19.068117788156	11.15	11.45	11.35
2010-10-25	0	8.55	11.75	10.64
2010-10-26	0	6.65	8.95	7.95
2010-10-27	0	6.35	16.65	11.56
2010-10-28	0	4.15	6.25	5.33
2010-10-29	0	5.75	17.75	13.71
2010-10-30	14.473743034443	14.05	14.45	14.2
2010-10-31	18.129602818462	11.75	16.55	15.18
2010-11-01	0.1	10.15	10.75	10.38
2010-11-02	0.077058177848735	10.05	17.15	13.95
2010-11-03	0	10.05	11.65	10.9
2010-11-04	0	13.25	22.45	18.39
2010-11-05	0.17705817784874	9.65	14.05	11.78
2010-11-06	0.1	7.45	16.25	12.02
2010-11-07	0.077058177848735	9.75	10.45	10.05
2010-11-08	1.2770581778487	2.25	10.65	7.97
2010-11-09	6.4229418221513	6.25	7.55	6.97
2010-11-10	0	6.75	14.75	10.64
2010-11-11	1.1541163556975	4.15	6.75	5.98
2010-11-12	0	9.25	18.95	15.28
2010-11-13	0	6.95	10.85	9.37
2010-11-14	0.3	15.95	17.85	16.84
2010-11-15	21.482698778885	15.75	16.15	16
2010-11-16	0	8.85	13.75	10.88
2010-11-17	0.7	5.95	8.65	7.08
2010-11-18	0.1	4.65	15.15	9.76
2010-11-19	17.595820819808	1.95	3.95	3.3200000000001
2010-11-20	17.50206902901	8.85	10.85	10.3
2010-11-21	0.27705817784873	8.35	9.95	9
2010-11-22	0.54588364430253	4.65	13.05	8.8200000000001
2010-11-23	0	2.35	4.35	3.62
2010-11-24	0	1.95	10.85	6.23
2010-11-25	0.23905340579206	-0.64999999999998	1.45	0.48000000000002
2010-11-26	0	-2.35	6.65	2.63
2010-11-27	1.1229418221513	-3.95	-2.35	-3.03
2010-11-28	0.17705817784874	1.05	7.95	4.66
2010-11-29	0	-1.35	0.75	-0.44999999999999
2010-11-30	8.1760095441134	1.85	5.05	3.48
2010-12-01	0.86199522794332	2.15	2.95	2.65
2010-12-02	0.1	-2.05	7.35	1.67
2010-12-03	0	-3.65	-1.85	-2.75
2010-12-04	0	-3.25	5.95	0.62
2010-12-05	3.1588493267372	-1.25	2.95	0.60000000000002
2010-12-06	0.26094659420794	10.85	13.75	12.5
2010-12-07	0.060946594207941	9.25	10.85	10.23
2010-12-08	0.11611158364079	8.85	17.15	13.53
2010-12-09	0	7.25	8.45	7.65
2010-12-10	0	2.25	9.75	6.59
2010-12-11	0	3.95	5.85	4.85
2010-12-12	0	2.65	7.85	6.08
2010-12-13	0	4.25	5.05	4.55
2010-12-14	0	-0.54999999999995	6.65	2.61
2010-12-15	0	-1.15	-0.25	-0.5
2010-12-16	0	-1.35	5.05	1.47
2010-12-17	0	0.25	2.35	1.52
2010-12-18	1.1229418221513	-5.65	6.25	0.76000000000005
2010-12-19	1.4218931884159	1.55	1.95	1.75
2010-12-20	0.58388841635921	3.85	9.45	7.17
2010-12-21	25.877752972435	6.65	7.05	6.77
2010-12-22	8.7309899365971	10.75	14.05	12.48
2010-12-23	13.639745729341	11.45	13.25	12.55
2010-12-24	0	2.55	7.45	5.0700000000001
2010-12-25	0	1.35	2.45	1.97
2010-12-26	0	-1.25	4.95	1.71
2010-12-27	0.2	-1.55	-0.049999999999955	-0.88
2010-12-28	0	1.85	8.95	5.6
2010-12-29	0.1	1.05	1.45	1.25
2010-12-30	1.5229418221513	6.65	9.45	7.9
2010-12-31	0	7.95	8.25	8.03
2011-01-01	0	4.35	10.95	7.13
2011-01-02	0	3.25	4.15	3.87
2011-01-03	0.37705817784874	1.25	5.65	3.62
2011-01-04	0	1.75	2.55	2
2011-01-05	2.2390534057921	2.25	6.35	4.96
2011-01-06	0.7311745335462	5.75	6.45	6.05
2011-01-07	0	12.85	14.15	13.37
2011-01-08	0	12.45	12.95	12.75
2011-01-09	9.5490270744715	7.65	13.25	11.18
2011-01-10	0.077058177848735	5.45	7.05	6
2011-01-11	1.0229418221513	1.25	6.85	4.55
2011-01-12	0	2.65	4.45	3.87
2011-01-13	0	7.35	18.25	12.62
2011-01-14	0	6.75	8.95	8.25
2011-01-15	0	5.15	16.55	10.94
2011-01-16	0	2.25	3.95	2.97
2011-01-17	0.1	4.35	13.25	8.92
2011-01-18	0	4.25	4.75	4.47
2011-01-19	0	4.65	10.75	8.0700000000001
2011-01-20	0	3.35	4.45	3.78
2011-01-21	0	1.75	5.85	3.8200000000001
2011-01-22	0	0.25	1.45	0.85000000000002
2011-01-23	0	-1.15	3.95	1.16
2011-01-24	0	-0.94999999999999	-0.54999999999995	-0.77999999999997
2011-01-25	0	0.45000000000005	9.15	5.0700000000001
2011-01-26	0	-0.94999999999999	0.15000000000003	-0.34999999999997
2011-01-27	0	2.05	9.95	5.72
2011-01-28	0	1.35	1.85	1.65
2011-01-29	15.018052492623	2.55	4.65	3.19
2011-01-30	0.3	2.35	2.55	2.45
2011-01-31	0.1	0.15000000000003	6.05	2.58
2011-02-01	0	-0.75	0.15000000000003	-0.38
2011-02-02	0.1	0.25	7.75	3.87
2011-02-03	0	1.25	1.85	1.55
2011-02-04	0	5.65	16.35	11.18
2011-02-05	0	7.65	8.05	7.8200000000001
2011-02-06	0	4.15	17.85	10.43
2011-02-07	0	3.35	4.45	4.1
2011-02-08	0	2.15	12.45	7.43
2011-02-09	0	2.05	3.75	2.78
2011-02-10	0	0.45000000000005	5.95	4.0700000000001
2011-02-11	0	3.95	4.95	4.48
2011-02-12	0.1	3.95	14.75	9.18
2011-02-13	3.7171884558371	2.05	3.35	2.48
2011-02-14	1.2823013465257	8.35	11.15	9.8200000000001
2011-02-15	0	6.55	8.25	7.38
2011-02-16	0.3	5.85	14.45	9.58
2011-02-17	2.3551649894329	6.25	7.05	6.67
2011-02-18	0	4.05	15.35	9.54
2011-02-19	0.2	1.65	3.25	2.33
2011-02-20	0	5.95	14.05	10.12
2011-02-21	2.4369561383213	2.55	5.15	3.85
2011-02-22	0	6.55	13.05	9.48
2011-02-23	0	3.45	5.95	4.42
2011-02-24	0	5.45	16.45	11.26
2011-02-25	0	7.65	11.05	9.9
2011-02-26	0	8.85	15.75	11.93
2011-02-27	0	7.65	11.35	9.43
2011-02-28	0	6.05	11.55	8.8
2011-03-01	0	5.55	6.85	6.33
2011-03-02	0	4.45	12.45	8.52
2011-03-03	0	5.25	5.75	5.55
2011-03-04	0	3.25	14.45	9.78
2011-03-05	0	3.85	6.65	5.17
2011-03-06	0	3.85	16.75	11.38
2011-03-07	0	4.55	7.85	6.6
2011-03-08	0	2.55	12.35	8.08
2011-03-09	0	-0.54999999999995	1.95	0.65000000000003
2011-03-10	0	3.15	16.75	10.31
2011-03-11	0	6.05	7.05	6.62
2011-03-12	29.452557524325	8.25	12.15	10.26
2011-03-13	11.056752059266	9.85	10.05	9.92
2011-03-14	14.54867570636	9.65	14.45	12.27
2011-03-15	26.90507145544	11.15	12.45	11.7
2011-03-16	3.6894854241852	9.85	13.95	11.61
2011-03-17	0	6.35	9.65	8.4
2011-03-18	0	9.45	16.25	13.08
2011-03-19	0	9.05	11.55	10.35
2011-03-20	0	7.05	15.15	11.1
2011-03-21	0	5.85	7.65	6.85
2011-03-22	0	4.05	15.65	10.83
2011-03-23	0	2.95	6.05	4.65
2011-03-24	0	3.55	19.45	13.21
2011-03-25	0	2.45	6.25	4.3
2011-03-26	0.26094659420794	5.45	18.45	12.78
2011-03-27	35.117826773502	10.75	11.05	10.92
2011-03-28	0	8.35	18.15	13.87
2011-03-29	0	6.55	7.75	7.0700000000001
2011-03-30	0	8.05	19.95	16.09
2011-03-31	0	11.45	13.65	12.55
2011-04-01	0	11.95	23.15	17.44
2011-04-02	0	12.05	12.45	12.25
2011-04-03	0.039053405792059	9.15	20.05	15.71
2011-04-04	0	10.85	12.35	11.33
2011-04-05	0	12.85	24.05	19.04
2011-04-06	0.039053405792059	9.15	14.25	11.17
2011-04-07	0	8.45	25.65	18.22
2011-04-08	0	13.45	15.65	14.93
2011-04-09	0	16.05	29.35	22.79
2011-04-10	0	14.35	16.45	15.17
2011-04-11	0	16.45	26.85	22.38
2011-04-12	0	16.25	18.05	16.92
2011-04-13	0	10.15	20.15	15.52
2011-04-14	0.85411635569747	10.65	11.95	11.52
2011-04-15	0	9.45	19.45	14.49
2011-04-16	0.1	6.95	8.85	7.73
2011-04-17	0.039053405792059	8.45	19.85	15.15
2011-04-18	0	7.55	9.55	8.37
2011-04-19	0	6.75	20.85	15.33
2011-04-20	0	6.45	7.85	6.97
2011-04-21	0	10.75	21.55	16.98
2011-04-22	0.46199522794332	7.95	9.45	8.53
2011-04-23	4.1068302385105	13.75	15.65	14.89
2011-04-24	0.1	13.05	13.55	13.3
2011-04-25	1.8541163556975			0
2011-04-26	0.1	13.25	24.95	20.54
2011-04-27	0	14.05	16.05	14.78
2011-04-28	0.76199522794332	12.75	21.35	17.16
2011-04-29	0.30104863373538	10.45	12.45	11.25
2011-04-30	0	10.65	21.85	17.58
2011-05-01	0.13905340579206	9.75	11.65	10.4
2011-05-02	0	11.65	22.95	18.06
2011-05-03	0	11.15	12.65	11.7
2011-05-04	0	14.75	23.75	19.84
2011-05-05	0.17810681158412	11.75	13.95	12.67
2011-05-06	0	12.15	22.15	18.07
2011-05-07	0	10.95	12.25	11.4
2011-05-08	0	14.45	24.55	20.77
2011-05-09	0	12.35	14.45	13.22
2011-05-10	0	13.45	24.45	19.86
2011-05-11	0	11.25	13.35	12.07
2011-05-12	0.17705817784874	14.15	26.15	20.54
2011-05-13	0.39071865486968	16.65	17.85	17.12
2011-05-14	3.1660334043967	15.25	22.25	19.38
2011-05-15	0	12.35	14.45	13.28
2011-05-16	0	14.45	23.85	19.79
2011-05-17	0	14.55	15.95	15
2011-05-18	0	12.75	24.15	19.46
2011-05-19	0	10.95	11.95	11.4
2011-05-20	0	16.55	28.15	23.13
2011-05-21	0	13.65	16.35	14.87
2011-05-22	0	17.15	30.55	25.51
2011-05-23	0	19.25	21.55	20.15
2011-05-24	0	21.95	33.15	28.51
2011-05-25	0	18.45	21.55	19.53
2011-05-26	0.12294182215127	18.45	29.95	26.02
2011-05-27	0.13800477205668	17.85	21.35	20.28
2011-05-28	0	15.75	27.15	22.08
2011-05-29	0	15.35	16.85	16
2011-05-30	0.2	16.25	25.15	21.72
2011-05-31	1.6437863768318	15.95	17.95	16.68
2011-06-01	3.8020972674708	12.95	16.95	14.86
2011-06-02	7.8688254664538	12.55	12.95	12.83
2011-06-03	14.606132972887	15.95	21.35	18.65
2011-06-04	9.9376638166195	15.35	15.75	15.58
2011-06-05	4.2183934480606	13.95	21.05	17.36
2011-06-06	0.13905340579206	12.45	13.65	12.95
2011-06-07	0	14.35	23.35	19.88
2011-06-08	0	16.25	17.15	16.67
2011-06-09	0.1	15.75	24.55	20.99
2011-06-10	0.152713882813	13.25	15.25	14.13
2011-06-11	0	16.75	25.45	21.11
2011-06-12	0	15.15	16.65	15.78
2011-06-13	0	17.45	28.95	23.73
2011-06-14	0	17.85	19.35	18.3
2011-06-15	0	19.55	30.85	26.18
2011-06-16	0	16.85	18.95	17.85
2011-06-17	0.04588364430253	19.75	24.75	22.36
2011-06-18	0	19.95	20.55	20.25
2011-06-19	0	16.65	26.15	21.91
2011-06-20	0.055164989432853	14.65	17.15	15.85
2011-06-21	1.4486628226477	19.75	27.35	23.9
2011-06-22	0.85726225690362	18.65	19.75	19.13
2011-06-23	0.1	19.35	27.75	23.09
2011-06-24	0	16.75	19.45	17.72
2011-06-25	0	20.85	31.45	26.93
2011-06-26	0	20.95	22.45	21.63
2011-06-27	0	18.75	30.25	25.79
2011-06-28	0	17.25	19.25	17.93
2011-06-29	0	21.15	31.15	26.62
2011-06-30	0	19.45	20.65	19.92
2011-07-01	0	20.15	28.75	25.07
2011-07-02	0	18.45	19.55	18.87
2011-07-03	0.42767479319097	19.15	30.85	25.23
2011-07-04	0	18.65	18.95	18.77
2011-07-05	0.061995227943324	20.05	34.05	28.69
2011-07-06	0.31470911075633	18.15	19.35	18.6
2011-07-07	0	21.05	27.45	24.35
2011-07-08	0	18.45	21.35	19.53
2011-07-09	0	20.55	30.75	26.09
2011-07-10	0	19.35	20.45	19.78
2011-07-11	0	22.05	34.25	28.47
2011-07-12	24.250616615342	19.55	21.35	20.23
2011-07-13	1.5227572252022	18.45	27.25	22.49
2011-07-14	0	16.85	18.05	17.32
2011-07-15	0	17.85	29.25	24.12
2011-07-16	0.21137861260109	15.85	17.75	16.55
2011-07-17	0.43082069439712	16.35	22.85	19.92
2011-07-18	1.5791554453195	15.45	17.05	16.17
2011-07-19	22.058849326737	15.55	23.35	19.42
2011-07-20	0	15.55	16.95	16.07
2011-07-21	0	17.55	26.85	23.49
2011-07-22	0	16.45	18.45	17.28
2011-07-23	0	18.45	26.95	22.99
2011-07-24	0	15.15	18.75	16.47
2011-07-25	1.2609465942079	17.65	26.45	21.37
2011-07-26	2.9989513662646	17.55	18.05	17.7
2011-07-27	2.1161115836408	17.55	24.75	21.52
2011-07-28	0	17.35	18.85	17.9
2011-07-29	0	18.85	28.55	24.47
2011-07-30	0	18.55	20.15	19.18
2011-07-31	0	18.75	28.75	24.36
2011-08-01	0	17.75	20.15	18.63
2011-08-02	0	17.85	27.95	23.88
2011-08-03	0	17.35	18.35	17.73
2011-08-04	0	22.55	33.45	28.81
2011-08-05	0	22.25	24.25	22.97
2011-08-06	38.602461519295	21.15	26.75	24.44
2011-08-07	0.36094659420794	20.45	21.15	20.67
2011-08-08	0	18.65	26.75	23.06
2011-08-09	0	15.45	18.15	16.4
2011-08-10	0	18.25	26.95	23.03
2011-08-11	0	16.15	18.75	17.15
2011-08-12	0	15.75	31.35	25.12
2011-08-13	0	18.75	19.55	19.05
2011-08-14	0.72434429503573	19.65	29.05	24.45
2011-08-15	0	18.95	20.55	19.62
2011-08-16	0.2	21.55	33.05	28.03
2011-08-17	0.1	19.75	21.15	20.25
2011-08-18	0	19.55	30.65	25.92
2011-08-19	0	18.95	21.15	19.88
2011-08-20	0	19.45	34.45	28.14
2011-08-21	0.022941822151265	19.15	21.75	20.27
2011-08-22	0	19.65	34.35	28.32
2011-08-23	0.04588364430253	19.75	22.45	20.85
2011-08-24	0	20.05	31.15	26.65
2011-08-25	0	21.85	22.75	22.32
2011-08-26	0.87004334238918	13.65	28.35	22.34
2011-08-27	0	11.85	13.45	12.53
2011-08-28	0	16.75	28.25	22.97
2011-08-29	0	16.45	17.15	16.87
2011-08-30	0	17.85	30.35	24.53
2011-08-31	0	16.15	17.25	16.6
2011-09-01	0.2688254664538	19.75	28.85	24.53
2011-09-02	0	19.45	20.25	19.83
2011-09-03	0	20.45	27.45	24.13
2011-09-04	0.95411635569747	20.45	21.85	21.2
2011-09-05	0	18.25	27.15	22.79
2011-09-06	0	14.65	17.75	15.85
2011-09-07	0	15.15	29.95	24.63
2011-09-08	0	18.15	21.55	19.65
2011-09-09	0	20.05	32.15	26.22
2011-09-10	0	18.45	19.85	19.18
2011-09-11	0	18.65	27.65	23.12
2011-09-12	0	18.65	20.35	19.77
2011-09-13	0	20.15	31.85	26.79
2011-09-14	0	21.75	22.35	22.15
2011-09-15	0	17.05	30.05	23.37
2011-09-16	0	16.25	17.35	16.72
2011-09-17	0	19.45	28.45	23.71
2011-09-18	0	18.15	21.55	20.3
2011-09-19	0	12.95	21.95	17.86
2011-09-20	0	14.75	24.15	18.69
2011-09-21	0	11.95	27.05	19.24
2011-09-22	0	13.15	28.15	20.71
2011-09-23	0	14.75	28.15	20.85
2011-09-24	0	12.35	23.95	18.77
2011-09-25	0	17.45	26.45	21.14
2011-09-26	0.3688254664538	13.85	30.35	21.45
2011-09-27	0	16.65	29.35	22.2
2011-09-28	0	14.55	29.55	21.15
2011-09-29	0	13.55	28.65	20.13
2011-09-30	0	13.15	28.95	20.15
2011-10-01	0	13.15	29.85	20.32
2011-10-02	0.11716021737618	12.15	30.45	20.73
2011-10-03	0	13.85	30.35	21.88
2011-10-04	0	15.15	30.75	22.77
2011-10-05	0	16.95	26.75	21.15
2011-10-06	0	13.15	28.35	21.05
2011-10-07	0	12.15	20.05	16.78
2011-10-08	0	10.05	19.85	14.45
2011-10-09	0	10.95	20.35	15.6
2011-10-10	0	12.75	26.65	19.56
2011-10-11	0	15.55	29.05	21.09
2011-10-12	0	14.25	27.65	19.95
2011-10-13	0	15.65	23.25	18.86
2011-10-14	0	11.75	21.95	17
2011-10-15	0	9.85	20.65	14.27
2011-10-16	0	7.65	22.45	14.22
2011-10-17	0	8.45	21.55	13.83
2011-10-18	0	10.45	21.35	15.75
2011-10-19	0.3	9.75	20.55	15.03
2011-10-20	0	8.65	16.25	11.8
2011-10-21	0	7.25	17.65	11.24
2011-10-22	0	6.55	17.35	11.66
2011-10-23	1.3737341682719	10.45	16.55	13.05
2011-10-24	23.77722093147	10.75	16.45	13.59
2011-10-25	0.68931618198521	11.25	20.15	15.36
2011-10-26	0	7.25	20.15	12.68
2011-10-27	18.097019323453	12.45	18.35	15.16
2011-10-28	7.0083979360537	13.65	16.45	14.74
2011-10-29	0	10.95	20.65	15.41
2011-10-30	0	10.65	21.75	15.53
2011-10-31	0	11.15	18.65	14.94
2011-11-01	14.184924166383	13.55	18.25	15.3
2011-11-02	0	14.05	18.95	16.58
2011-11-03	39.327488649738	15.65	19.15	17.21
2011-11-04	29.27000861535	16.75	19.35	17.9
2011-11-05	88.905213290267	13.25	17.05	14.99
2011-11-06	1.2	11.75	15.15	13.79
2011-11-07	10.050970454491	10.55	19.65	14.09
2011-11-08	6.9057816047751	10.25	17.15	13.21
2011-11-09	3.6516652490776	10.35	16.55	13.6
2011-11-10	0.068825466453795	10.55	18.95	14.27
2011-11-11	0	10.55	17.25	13.7
2011-11-12	0	11.95	17.95	14.57
2011-11-13	0	8.35	18.45	12.25
2011-11-14	0	6.65	16.35	11.05
2011-11-15	0	8.15	16.05	11.13
2011-11-16	0	5.95	17.25	10
2011-11-17	0	5.05	16.05	9.64
2011-11-18	0.6	6.95	15.55	10.7
2011-11-19	2.4565674623173	11.95	13.65	12.93
2011-11-20	0	12.25	14.95	13.24
2011-11-21	0	11.55	16.35	13.79
2011-11-22	0	9.75	16.45	12.82
2011-11-23	0	9.05	17.55	12.8
2011-11-24	0	5.15	13.85	10
2011-11-25	0	3.25	14.95	8.28
2011-11-26	0	6.45	15.75	10.18
2011-11-27	0	3.35	14.65	7.63
2011-11-28	0	4.95	12.55	7.65
2011-11-29	4.6807142766921	6.05	12.55	9.83
2011-11-30	0	7.25	17.75	11.69
2011-12-01	0	7.45	16.15	12.4
2011-12-02	0.43450503170144	7.55	15.85	13.4
2011-12-03	1.2	7.45	12.95	9.83
2011-12-04	0	8.15	16.85	11.53
2011-12-05	0	5.45	14.35	10.94
2011-12-06	0	4.95	14.35	8.78
2011-12-07	0	6.95	15.55	10.96
2011-12-08	0	4.75	15.85	10.28
2011-12-09	0	4.05	12.65	6.97
2011-12-10	0	3.25	14.95	7.39
2011-12-11	0	1.65	11.75	6.12
2011-12-12	0	2.85	13.85	8.25
2011-12-13	0.3	1.15	8.85	4.96
2011-12-14	0	3.25	13.95	8.18
2011-12-15	0	2.35	13.45	7.93
2011-12-16	1.5	6.25	12.45	9.24
2011-12-17	0	0.35000000000002	11.25	6.16
2011-12-18	0	-0.54999999999995	9.25	3.3
2011-12-19	0	-0.54999999999995	8.95	2.96
2011-12-20	0	0.95000000000005	7.15	3.83
2011-12-21	0	2.55	11.35	7.84
2011-12-22	0	8.45	15.25	11.63
2011-12-23	0	6.65	15.95	11.6
2011-12-24	0	5.95	11.05	8.78
2011-12-25	0	5.55	9.95	7.35
2011-12-26	0	3.35	11.35	6.81
2011-12-27	0	0.25	13.55	4.68
2011-12-28	0	-0.94999999999999	12.75	4.49
2011-12-29	0	3.65	11.05	7.55
2011-12-30	0	0.65000000000003	14.35	6.29
2011-12-31	0	2.85	16.25	8.5700000000001
2012-01-01	0	6.75	19.65	10.9
2012-01-02	3.7688254664538	6.55	11.55	9.73
2012-01-03	0	3.15	14.05	7.55
2012-01-04	0	3.65	13.85	7.37
2012-01-05	0	0.65000000000003	15.35	8.85
2012-01-06	0	6.35	11.45	9.36
2012-01-07	0	4.65	12.95	7.42
2012-01-08	0	5.45	13.95	9.2
2012-01-09	0	5.55	11.95	8.52
2012-01-10	0	7.25	13.15	9.66
2012-01-11	0	2.15	13.65	6.88
2012-01-12	0	-0.25	10.45	3.56
2012-01-13	0	1.25	12.85	6.99
2012-01-14	0	1.65	8.25	5.31
2012-01-15	4.3	0.55000000000001	9.25	3.78
2012-01-16	0	2.45	10.75	5.55
2012-01-17	0	-1.05	11.65	4.13
2012-01-18	0	-0.25	11.25	3.74
2012-01-19	0	-1.15	13.95	6.2
2012-01-20	0	6.85	16.65	10.92
2012-01-21	0	5.15	16.25	9.95
2012-01-22	0	6.75	16.75	11.17
2012-01-23	0	7.95	14.25	10.3
2012-01-24	0	5.35	14.75	9.28
2012-01-25	0	3.85	15.75	8.92
2012-01-26	0	4.35	11.75	7.83
2012-01-27	0	4.25	13.25	8.34
2012-01-28	0	4.35	11.65	7.3
2012-01-29	0	3.65	7.45	5.42
2012-01-30	0	0.050000000000011	8.15	4.25
2012-01-31	4.0556880707819	-0.14999999999998	2.65	1.35
2012-02-01	0	-0.84999999999997	4.75	1.24
2012-02-02	0	-2.55	0.65000000000003	-0.89999999999998
2012-02-03	0	-4.55	-0.049999999999955	-2.47
2012-02-04	0	-6.75	-1.55	-4.44
2012-02-05	0	-7.05	0.55000000000001	-3.98
2012-02-06	0	-5.95	3.45	-1.73
2012-02-07	0	-5.05	-1.25	-3.34
2012-02-08	0	-6.45	0.15000000000003	-3.52
2012-02-09	0	-4.25	5.85	-0.069999999999993
2012-02-10	0	-3.25	2.65	-0.56999999999999
2012-02-11	0	-5.65	-1.25	-3.78
2012-02-12	0	-5.45	0.55000000000001	-3.06
2012-02-13	0	-4.05	3.25	-0.31999999999999
2012-02-14	0	0.35000000000002	8.65	3.64
2012-02-15	0	1.05	11.95	6.71
2012-02-16	0	6.55	12.75	9.25
2012-02-17	0	4.75	13.05	7.97
2012-02-18	0	1.15	14.05	6.26
2012-02-19	0	-0.54999999999995	14.35	5.8200000000001
2012-02-20	0	3.95	9.85	6.17
2012-02-21	0	1.95	12.35	6
2012-02-22	0	2.95	14.75	7.56
2012-02-23	0	5.85	19.95	11.92
2012-02-24	0	8.75	17.65	11.98
2012-02-25	0	7.25	18.25	11.75
2012-02-26	0	8.15	16.95	12.66
2012-02-27	0	5.55	14.65	9.66
2012-02-28	0	5.75	17.45	10.57
2012-02-29	0	3.05	20.65	10.97
2012-03-01	0	4.35	17.35	10.38
2012-03-02	0	6.25	16.85	9.67
2012-03-03	0	8.25	14.75	11.86
2012-03-04	0	8.55	17.05	12.45
2012-03-05	0	5.95	11.75	8.97
2012-03-06	0	3.45	11.75	7.85
2012-03-07	0	3.65	16.35	9.28
2012-03-08	0	5.35	13.25	9.63
2012-03-09	0	6.45	14.15	9.95
2012-03-10	0	6.25	16.55	10.6
2012-03-11	0	9.35	17.75	13.05
2012-03-12	0	9.25	19.25	15.44
2012-03-13	0.3	11.65	24.55	17.13
2012-03-14	0	6.65	22.45	15.05
2012-03-15	0	7.45	16.45	10.4
2012-03-16	0	9.85	16.45	12.54
2012-03-17	0	7.85	15.75	12.14
2012-03-18	16.319379116296	7.95	12.35	10.66
2012-03-19	0	3.85	13.95	8.37
2012-03-20	1.8229418221513	4.95	15.35	10.61
2012-03-21	0	8.95	17.25	12.33
2012-03-22	0	5.95	20.45	13.51
2012-03-23	0	8.45	19.35	14.26
2012-03-24	0	4.25	22.65	13.5
2012-03-25	0	6.85	24.25	15.37
2012-03-26	0	7.95	23.55	17.59
2012-03-27	0	7.65	24.65	15.67
2012-03-28	0	8.65	24.25	15.24
2012-03-29	0	5.95	25.65	18.72
2012-03-30	0	15.95	23.75	18.91
2012-03-31	0	13.15	26.05	18.69
2012-04-01	0	10.75	20.85	15.76
2012-04-02	0	6.75	19.85	14.47
2012-04-03	14.54695402792	9.55	17.45	13.6
2012-04-04	12.124516008273	11.25	14.15	12.49
2012-04-05	0	10.05	20.15	14.31
2012-04-06	0	11.75	17.75	14.4
2012-04-07	0	10.25	17.85	13.62
2012-04-08	0	8.85	16.15	12.37
2012-04-09	0	6.25	19.95	13.2
2012-04-10	1.5	8.45	14.35	11.39
2012-04-11	0	6.65	16.95	12.1
2012-04-12	0.9	8.45	16.95	13.05
2012-04-13	0	9.75	16.95	13.34
2012-04-14	0	7.85	17.35	12.4
2012-04-15	0	7.55	14.05	10.31
2012-04-16	0	8.95	12.85	10.38
2012-04-17	0	6.95	18.55	12.61
2012-04-18	0.3	9.55	17.15	12.41
2012-04-19	0	9.15	16.05	12.66
2012-04-20	0	8.05	18.05	12.35
2012-04-21	0.048334750922382	8.25	18.25	13.39
2012-04-22	0	8.05	18.25	13.13
2012-04-23	5.1413287816335	8.15	15.85	12.04
2012-04-24	0	7.85	14.95	12.08
2012-04-25	0	4.55	16.45	11.03
2012-04-26	1.7672537513693	11.85	21.75	17.83
2012-04-27	0	11.15	25.45	17.68
2012-04-28	24.982310212696	12.75	25.65	20.03
2012-04-29	0	13.05	18.05	15.59
2012-04-30	1.3171602173762	11.35	17.25	14.11
2012-05-01	0	9.95	20.05	14.84
2012-05-02	0	8.35	19.85	13.86
2012-05-03	0	10.15	20.95	14.74
2012-05-04	18.619936924684	10.75	17.05	14.6
2012-05-05	0	9.45	20.05	14.58
2012-05-06	0	10.95	21.45	16.87
2012-05-07	0	10.55	23.45	16.75
2012-05-08	0	10.55	19.05	15.24
2012-05-09	0	12.55	22.55	17.36
2012-05-10	0	14.55	24.25	18.77
2012-05-11	0	12.45	28.35	20.56
2012-05-12	0.62049071553141	14.75	28.95	20.76
2012-05-13	0	14.45	22.75	18.42
2012-05-14	0	12.45	24.35	17.55
2012-05-15	0	12.15	21.75	16.64
2012-05-16	0	9.75	18.05	14.27
2012-05-17	0.71401431617003	9.65	21.15	14.99
2012-05-18	1.8434325376827	11.95	21.05	15.66
2012-05-19	0	11.75	21.35	16.99
2012-05-20	38.718580422602	13.75	18.55	16.16
2012-05-21	3.8376509329076	12.25	14.95	13.59
2012-05-22	5.9401020395274	12.55	16.75	14.8
2012-05-23	0	14.45	24.85	20.63
2012-05-24	0	17.45	29.35	23.12
2012-05-25	0	17.65	29.55	21.13
2012-05-26	0	16.05	26.45	21.07
2012-05-27	3.266728198983	16.75	26.05	20.85
2012-05-28	0	16.65	28.75	22.45
2012-05-29	0	15.75	28.35	22.38
2012-05-30	0	15.35	30.05	23.19
2012-05-31	0	17.45	31.65	25.22
2012-06-01	0	20.05	31.55	25.88
2012-06-02	0	17.55	26.85	22.44
2012-06-03	4.5160729325052	16.55	22.15	20.01
2012-06-04	0	14.35	25.25	19.83
2012-06-05	0	13.85	26.75	20.75
2012-06-06	0	14.45	23.95	19.55
2012-06-07	2.3763633832624	18.45	24.05	21.59
2012-06-08	0	16.75	24.65	20.32
2012-06-09	0	16.65	25.45	20.74
2012-06-10	0.46234906709241	15.55	23.25	19.6
2012-06-11	7.7543009526466	14.45	25.65	19.44
2012-06-12	0	12.55	23.65	18.4
2012-06-13	0	13.35	25.25	19.7
2012-06-14	0	14.55	25.65	20.15
2012-06-15	0	13.65	25.95	20.68
2012-06-16	0	13.65	27.75	22.34
2012-06-17	0	14.15	32.05	23.43
2012-06-18	0	15.45	30.05	23.09
2012-06-19	0.3688254664538	17.75	28.65	22.97
2012-06-20	2.0057816047751	18.95	31.35	24.18
2012-06-21	0	17.75	31.25	25.87
2012-06-22	0	19.55	30.95	24.94
2012-06-23	0	19.15	31.25	24.83
2012-06-24	0	18.85	33.25	26.78
2012-06-25	0	22.65	32.05	27.35
2012-06-26	0	20.75	33.05	27.65
2012-06-27	0	21.75	34.35	27.53
2012-06-28	0.98617028077906	19.85	30.35	25.08
2012-06-29	0.8311745335462	19.05	31.35	25.56
2012-06-30	0	20.05	30.45	25.78
2012-07-01	24.128172107116	14.95	24.25	19.87
2012-07-02	0	14.95	24.75	19.76
2012-07-03	0.46864086950471	14.95	30.95	22.91
2012-07-04	0	17.65	30.15	24.44
2012-07-05	0.32049071553141	18.95	26.65	22.07
2012-07-06	0.068825466453795	16.35	29.65	23.5
2012-07-07	0.11716021737618	16.85	29.45	23.6
2012-07-08	0.66882546645379	20.25	31.35	25.6
2012-07-09	1.3108684149639	19.75	32.65	25.7
2012-07-10	0.068825466453795	19.95	32.15	26.09
2012-07-11	0.20647639936139	20.55	31.65	25.8
2012-07-12	0	18.45	28.45	23.17
2012-07-13	0	19.55	29.05	23.96
2012-07-14	0	19.65	28.15	23.7
2012-07-15	0	16.95	26.85	21.97
2012-07-16	0	16.05	28.15	22.5
2012-07-17	0	19.05	32.35	25.97
2012-07-18	0	18.85	34.45	26.62
2012-07-19	0	16.85	31.65	25.03
2012-07-20	0.048334750922382	21.55	31.95	26.15
2012-07-21	0	20.05	27.45	23.44
2012-07-22	0	18.95	28.45	23.48
2012-07-23	0	17.65	30.15	23.5
2012-07-24	0	16.25	31.95	24.02
2012-07-25	0	16.95	32.95	25.08
2012-07-26	0	18.25	30.65	24.29
2012-07-27	0	19.05	30.15	24.76
2012-07-28	0	19.95	33.95	27.11
2012-07-29	0	22.75	32.65	28.29
2012-07-30	0	19.45	33.35	25.39
2012-07-31	0	19.75	35.35	26.41
2012-08-01	0	17.65	30.35	24.36
2012-08-02	0	19.95	32.85	25.87
2012-08-03	0	22.35	34.15	27.91
2012-08-04	0.068825466453795	21.95	32.75	26.36
2012-08-05	0	21.45	30.05	25.08
2012-08-06	1.7746070712289	18.95	28.95	22.92
2012-08-07	0	17.35	30.95	24.3
2012-08-08	0	19.05	33.65	25.78
2012-08-09	0	20.55	35.45	27.61
2012-08-10	0	22.75	34.95	28.4
2012-08-11	0	20.95	35.15	27.17
2012-08-12	0	20.15	33.15	26.36
2012-08-13	0	21.35	31.75	26.02
2012-08-14	0	18.95	33.05	25.51
2012-08-15	0	19.15	29.45	24.6
2012-08-16	0	19.95	33.95	26.43
2012-08-17	0	20.25	34.25	26.21
2012-08-18	0	18.15	34.35	26.24
2012-08-19	0	18.75	35.15	26.51
2012-08-20	0	19.35	34.65	26.66
2012-08-21	0.3	21.95	36.75	28.09
2012-08-22	0	21.95	35.55	27.89
2012-08-23	0	22.25	29.85	25.61
2012-08-24	0	21.85	30.55	26.01
2012-08-25	0	21.25	32.45	26.22
2012-08-26	0	18.15	28.25	22.4
2012-08-27	0	17.85	29.45	22.03
2012-08-28	10.374607071229	19.05	25.45	22.24
2012-08-29	42.612818190117	19.85	27.05	23.01
2012-08-30	0	18.55	24.95	20.98
2012-08-31	0	15.25	21.85	18.43
2012-09-01	0	14.65	19.65	17.47
2012-09-02	0	15.95	25.15	21.4
2012-09-03	0	17.55	22.45	20.29
2012-09-04	0	17.55	28.35	23.13
2012-09-05	0	17.25	29.35	23.26
2012-09-06	0	20.05	28.85	23.89
2012-09-07	0	18.75	31.55	23.98
2012-09-08	0	17.45	30.45	22.99
2012-09-09	0	16.65	28.85	21.68
2012-09-10	0	18.95	27.85	23.07
2012-09-11	0	19.35	27.65	23.03
2012-09-12	0	15.25	21.85	18.71
2012-09-13	0	12.65	22.45	17.66
2012-09-14	0	15.05	25.75	19.89
2012-09-15	0	16.25	25.95	20.11
2012-09-16	0	12.95	26.25	19.11
2012-09-17	0	12.25	26.55	18.54
2012-09-18	0	14.95	24.25	19.85
2012-09-19	0	15.45	22.95	19.2
2012-09-20	0	13.25	24.45	18.68
2012-09-21	0	15.75	24.65	19.84
2012-09-22	0	16.45	27.05	20.46
2012-09-23	6.3649436484885	15.75	24.15	20.51
2012-09-24	5.5141989131191	17.15	24.75	21.47
2012-09-25	0	15.65	24.05	20.24
2012-09-26	6.9367715413722	10.35	21.65	17.38
2012-09-27	0	7.95	21.25	14.43
2012-09-28	0	12.55	22.55	17.55
2012-09-29	23.378795117592	14.15	18.35	16.14
2012-09-30	0	13.95	20.75	16.86
2012-10-01	0	13.35	24.25	19.44
2012-10-02	0	12.85	25.15	18.38
2012-10-03	0	11.15	25.45	16.32
2012-10-04	0.25166524907762	13.25	24.25	18.51
2012-10-05	0	12.95	21.45	16.71
2012-10-06	0	13.65	22.75	18.61
2012-10-07	0	15.35	24.95	19.78
2012-10-08	0	15.65	26.05	20.38
2012-10-09	0	15.25	26.55	20.93
2012-10-10	0.18283978262382	14.05	26.95	20.34
2012-10-11	0	16.15	23.35	18.99
2012-10-12	0	12.95	22.65	17.77
2012-10-13	0	9.25	21.65	14.68
2012-10-14	0	6.35	19.45	15.19
2012-10-15	0	7.25	16.85	12.35
2012-10-16	0	4.25	18.45	11.7
2012-10-17	0	11.65	21.55	17.39
2012-10-18	0	15.85	23.55	19.03
2012-10-19	0	16.65	24.35	20.44
2012-10-20	0	18.95	24.75	21.17
2012-10-21	12.405944358397	16.65	22.55	19.83
2012-10-22	14.948159020144	15.95	21.85	18.43
2012-10-23	0	14.65	23.85	17.92
2012-10-24	0	13.05	23.45	17.3
2012-10-25	5.6432479407336	11.25	20.75	15.64
2012-10-26	11.101921536692	15.35	18.55	16.49
2012-10-27	0	5.45	15.05	11.39
2012-10-28	0	3.95	8.45	6.56
2012-10-29	0	3.65	11.75	7.11
2012-10-30	0	0.65000000000003	14.45	7.78
2012-10-31	21.52800926005	5.85	10.55	8.98
2012-11-01	0	2.15	15.75	8.8
2012-11-02	0	5.45	17.45	11.06
2012-11-03	0.3	8.25	18.75	13.76
2012-11-04	0.55166524907762	12.55	17.15	14.45
2012-11-05	0	7.85	16.25	12.32
2012-11-06	0	4.95	15.15	9.69
2012-11-07	0	5.25	13.75	9.06
2012-11-08	0	3.45	16.65	9.81
2012-11-09	8.3866804784163	8.15	13.85	11.05
2012-11-10	0	12.85	16.35	14.38
2012-11-11	0.25166524907762	10.35	15.95	12.76
2012-11-12	0	7.95	15.85	11.37
2012-11-13	0	7.05	13.25	9.61
2012-11-14	0	7.25	18.75	11.19
2012-11-15	0	6.85	18.15	11.1
2012-11-16	0	6.95	15.05	11.05
2012-11-17	0	10.25	12.25	11.26
2012-11-18	0	8.95	14.75	11.58
2012-11-19	0.3	6.85	16.15	10.48
2012-11-20	0	3.75	17.35	8.95
2012-11-21	0	2.25	12.75	7.8
2012-11-22	0	5.95	15.85	10.77
2012-11-23	0	5.75	15.95	10.9
2012-11-24	0.2311745335462	11.45	16.05	13.72
2012-11-25	0	12.75	16.05	13.84
2012-11-26	9.4541163556975	9.45	16.45	13.69
2012-11-27	5.1089275059812	7.85	10.25	8.99
2012-11-28	18.376528607921	6.55	8.95	7.46
2012-11-29	0	5.85	10.05	8
2012-11-30	0	3.95	7.35	5.64
2012-12-01	0	2.25	7.25	4.45
2012-12-02	0	1.05	9.95	4.66
2012-12-03	0	1.35	10.95	5.42
2012-12-04	0	3.45	12.15	8.68
2012-12-05	0	1.15	11.15	4.77
2012-12-06	0	-0.14999999999998	7.85	4.2
2012-12-07	0.3	-2.25	2.55	-0.25
2012-12-08	0	-1.45	8.25	3.15
2012-12-09	0	0.65000000000003	7.15	3.35
2012-12-10	0	0.25	10.75	4.66
2012-12-11	0	0.15000000000003	6.15	3.05
2012-12-12	0	-0.84999999999997	5.95	2.49
2012-12-13	6.0430633437845	2.45	8.15	6.6
2012-12-14	0.48283978262382	7.65	12.95	10.05
2012-12-15	0	5.55	16.85	10.57
2012-12-16	0	5.35	16.15	8.81
2012-12-17	0	4.65	14.85	9.04
2012-12-18	0	2.75	13.95	7.42
2012-12-19	0	2.85	10.15	5.79
2012-12-20	7.7648001737123	3.25	9.65	7.75
2012-12-21	0	2.65	10.85	6.14
2012-12-22	0	5.05	11.35	7.26
2012-12-23	0	3.35	15.55	7.54
2012-12-24	0.48283978262382	4.05	11.85	8.8
2012-12-25	1.8229418221513	9.95	13.05	11.47
2012-12-26	0	5.25	15.05	10.06
2012-12-27	0	3.75	14.75	9.66
2012-12-28	0	6.95	13.75	9.95
2012-12-29	2.2574468538527	2.75	14.75	8.22
2012-12-30	0	4.65	13.35	8.26
2012-12-31	0.6	3.85	11.65	6.48
2013-01-01	4.0998154030509	5.45	9.85	7.52
2013-01-02	0	4.75	10.25	7.27
2013-01-03	0	4.65	11.85	7.41
2013-01-04	0	7.65	13.05	10.51
2013-01-05	0	8.85	13.25	10.79
2013-01-06	0	8.65	12.65	9.9
2013-01-07	0	4.05	12.85	8.74
2013-01-08	0.3	0.45000000000005	12.75	5.21
2013-01-09	0	-1.15	9.25	2.7
2013-01-10	0	0.050000000000011	10.95	4.12
2013-01-11	0	3.15	13.85	8.45
2013-01-12	0	0.95000000000005	9.85	4.33
2013-01-13	0	2.05	9.05	5.08
2013-01-14	0	-0.64999999999998	8.55	4
2013-01-15	0	-2.05	6.45	0.96000000000004
2013-01-16	0	0.15000000000003	4.25	1.97
2013-01-17	0	-2.05	3.55	0.14000000000004
2013-01-18	5.4413287816335	-1.05	3.05	0.87
2013-01-19	9.3725033151797	-0.049999999999955	9.95	5.13
2013-01-20	0.8311745335462	0.35000000000002	10.65	6.01
2013-01-21	0	-0.64999999999998	10.25	3.04
2013-01-22	5.0273144654635	-0.94999999999999	10.35	5.52
2013-01-23	4.3	1.85	6.95	5.02
2013-01-24	0	0.55000000000001	8.05	3.71
2013-01-25	0	-0.049999999999955	5.85	2.81
2013-01-26	0	-2.25	9.45	2.65
2013-01-27	9.1896635325559	-0.44999999999999	7.75	3.25
2013-01-28	0	3.35	13.45	7.55
2013-01-29	0	2.55	15.35	7.34
2013-01-30	0	2.95	19.85	9.92
2013-01-31	0	8.25	15.75	11.98
2013-02-01	0	7.45	16.05	11.3
2013-02-02	0	5.85	11.45	9.01
2013-02-03	0	2.75	8.05	5.56
2013-02-04	0	1.95	2.75	2.3
2013-02-05	0	4.95	14.35	8.3200000000001
2013-02-06	0	0.050000000000011	11.15	5.11
2013-02-07	0	1.85	8.25	4.72
2013-02-08	0	0.35000000000002	9.05	4.73
2013-02-09	0	-0.75	8.25	2.9
2013-02-10	14.107518544518	-0.44999999999999	3.25	1.53
2013-02-11	0.3	0.25	8.75	3.31
2013-02-12	0	-1.05	9.65	3.68
2013-02-13	0	-0.44999999999999	7.65	3.66
2013-02-14	0	-0.84999999999997	10.25	2.96
2013-02-15	0	-0.54999999999995	12.85	6.46
2013-02-16	0	2.95	12.15	6.91
2013-02-17	2.7807425151531	-0.64999999999998	11.95	4.84
2013-02-18	0	2.05	8.05	5.53
2013-02-19	0.3	0.15000000000003	12.45	4.11
2013-02-20	0	-0.54999999999995	14.25	6.21
2013-02-21	0	1.15	8.85	4.54
2013-02-22	0	-1.25	6.95	1.94
2013-02-23	0.18598568382997	-2.45	4.05	0.40000000000003
2013-02-24	0	-1.55	4.15	1.05
2013-02-25	0	-3.05	7.25	2.0700000000001
2013-02-26	0	-1.75	10.15	2.18
2013-02-27	0	1.05	11.35	5.53
2013-02-28	0	-1.15	13.35	6.22
2013-03-01	0	4.45	10.35	6.79
2013-03-02	0	2.25	11.75	6.47
2013-03-03	0	0.050000000000011	16.05	6.75
2013-03-04	0	1.25	15.15	6.8
2013-03-05	32.387750862034	9.65	13.65	11.92
2013-03-06	32.844993746647	9.55	10.75	10.11
2013-03-07	13.50139206021	9.25	14.75	11.01
2013-03-08	1.5917672886051	8.15	19.25	13.36
2013-03-09	1.341858351561	7.65	17.45	11.42
2013-03-10	2.969702386952	5.05	17.05	10.25
2013-03-11	0	5.35	17.45	10
2013-03-12	0	4.65	15.35	9.43
2013-03-13	0	2.35	10.35	6.38
2013-03-14	0	1.35	7.95	4.96
2013-03-15	0	0.35000000000002	9.25	4.84
2013-03-16	2.0057816047751	-3.05	11.85	4.49
2013-03-17	39.819600817876	5.95	10.55	8.55
2013-03-18	0	5.35	12.65	8.24
2013-03-19	1.7311745335462	2.85	14.05	8.63
2013-03-20	3.81401431617	6.85	16.15	9.76
2013-03-21	0	3.15	16.55	9.5700000000001
2013-03-22	0	2.35	13.95	9.49
2013-03-23	9.3884367904498	8.25	12.95	10.17
2013-03-24	5.4746070712289	8.75	10.65	9.81
2013-03-25	0	5.35	17.15	11.61
2013-03-26	0	6.55	15.85	10.51
2013-03-27	0.048334750922382	3.55	15.35	8.92
2013-03-28	11.95358678577	9.15	9.95	9.58
2013-03-29	10.357262256904	8.35	15.65	11.46
2013-03-30	3.0150629499054	10.45	17.05	12.4
2013-03-31	0	5.15	13.75	9.88
2013-04-01	4.8311745335462	4.35	8.35	6.71
2013-04-02	0.3	6.85	15.55	11.53
2013-04-03	0	5.85	17.15	11.17
2013-04-04	1.6828397826238	7.45	13.65	10.06
2013-04-05	0.068825466453795	8.25	16.75	12.44
2013-04-06	12.545883644303	6.75	9.35	8.03
2013-04-07	0	5.05	15.45	10.03
2013-04-08	1.1311745335462	5.95	14.55	10.25
2013-04-09	0	3.95	17.85	8.83
2013-04-10	0	6.85	18.95	12.52
2013-04-11	2.6057816047751	8.95	16.25	13.05
2013-04-12	0	8.35	19.35	15.19
2013-04-13	0	9.75	21.65	14.78
2013-04-14	0	7.25	21.25	14.89
2013-04-15	0	7.15	23.55	15.25
2013-04-16	0	9.75	27.95	17.84
2013-04-17	0	11.95	24.25	16.86
2013-04-18	0	10.55	25.35	19.31
2013-04-19	0.18283978262382	10.85	16.75	14.13
2013-04-20	2.6541163556975	9.05	10.85	9.99
2013-04-21	0	7.85	16.55	11.45
2013-04-22	0	7.55	19.75	15.07
2013-04-23	0	10.15	20.45	15.92
2013-04-24	0	8.35	22.45	14.31
2013-04-25	0	11.45	24.55	18.13
2013-04-26	6.2401020395274	14.25	16.05	15.3
2013-04-27	9.8949131898112	4.35	13.95	9.89
2013-04-28	18.712952798723	4.15	9.05	7.0700000000001
2013-04-29	16.842737743096	7.75	12.75	10.2
2013-04-30	5.7467630358379	11.75	16.95	14.59
2013-05-01	11.755690541819	8.95	20.45	14.65
2013-05-02	0.23432043475235	8.15	21.25	14.77
2013-05-03	0	9.75	22.25	15.96
2013-05-04	0	11.75	21.45	16.87
2013-05-05	0	13.75	21.85	17.35
2013-05-06	0	12.85	26.25	19.54
2013-05-07	0	13.85	25.75	19.38
2013-05-08	0	13.75	23.45	18.82
2013-05-09	0.3	15.85	23.25	18.98
2013-05-10	0	12.75	20.75	17.55
2013-05-11	0	10.15	21.25	16.25
2013-05-12	0	11.55	20.55	16.19
2013-05-13	0	10.25	25.05	17.11
2013-05-14	0.66882546645379	12.35	23.95	17.75
2013-05-15	12.136426568394	13.15	16.95	15.11
2013-05-16	1.4572622569036	9.95	16.05	12.97
2013-05-17	12.848130781683	9.35	16.65	12.93
2013-05-18	28.888786612058	11.95	15.45	13.4
2013-05-19	0	9.65	19.45	14.27
2013-05-20	0	6.75	19.05	13.71
2013-05-21	0	7.95	20.45	14.73
2013-05-22	0	10.85	20.95	15.17
2013-05-23	0	9.45	21.35	15.59
2013-05-24	0	7.85	15.25	12.29
2013-05-25	0.096669501844764	8.85	16.25	12.67
2013-05-26	0	7.85	19.65	13.91
2013-05-27	0	8.45	20.55	14.98
2013-05-28	1.2483347509224	8.45	14.75	12.48
2013-05-29	0	6.05	16.45	12.11
2013-05-30	0	7.25	19.25	13.5
2013-05-31	0	8.85	19.75	15.31
2013-06-01	0	16.75	22.95	18.94
2013-06-02	0	16.35	22.95	19.29
2013-06-03	0	15.05	23.75	19.08
2013-06-04	0	13.15	23.35	17.95
2013-06-05	0	11.25	23.85	17.96
2013-06-06	0	11.15	24.85	18.7
2013-06-07	0	11.65	26.25	19.42
2013-06-08	9.7541163556975	15.25	17.45	16.2
2013-06-09	7.9507858575422	14.55	21.45	17.6
2013-06-10	0	12.65	25.95	19.29
2013-06-11	0	15.15	27.25	21.58
2013-06-12	0	16.85	31.25	22.87
2013-06-13	0	19.95	27.35	24.07
2013-06-14	0	17.45	28.35	21.96
2013-06-15	0	16.35	30.75	23.33
2013-06-16	0	18.05	27.95	22.8
2013-06-17	0	16.85	32.45	24.9
2013-06-18	0	20.45	31.75	25.83
2013-06-19	2.1607773520079	18.75	23.15	21.45
2013-06-20	0	16.95	24.25	20.04
2013-06-21	0	15.55	26.05	21.63
2013-06-22	0	17.85	28.95	23.29
2013-06-23	0	16.75	25.95	22.02
2013-06-24	0	14.75	22.75	18.72
2013-06-25	0	14.55	24.85	19.69
2013-06-26	0	15.35	25.45	20.28
2013-06-27	0	15.95	24.75	19.94
2013-06-28	0	15.35	24.35	19.71
2013-06-29	0.068825466453795	13.85	27.65	21.05
2013-06-30	0	17.45	28.75	22.93
2013-07-01	0	15.65	27.85	21.49
2013-07-02	2.7873881567144	15.15	27.65	19.66
2013-07-03	1.2	17.05	26.95	21.89
2013-07-04	0	17.95	29.35	23.64
2013-07-05	0	20.05	31.25	25.37
2013-07-06	0	20.05	34.45	26.37
2013-07-07	0	22.75	33.95	27.52
2013-07-08	22.345390254473	21.15	32.15	27.53
2013-07-09	0	18.75	32.25	25.76
2013-07-10	1.5173448143253	19.05	32.45	25.64
2013-07-11	0	17.45	30.95	24.7
2013-07-12	0	20.95	32.05	26.31
2013-07-13	0.068825466453795	21.95	33.15	26.88
2013-07-14	0.65148065212853	21.75	32.15	26.94
2013-07-15	0	21.05	34.05	27.77
2013-07-16	0.18598568382997	22.45	34.25	27.79
2013-07-17	0	21.25	30.75	25.34
2013-07-18	1.1075379168086	19.25	31.45	23.27
2013-07-19	0	18.95	29.05	24.12
2013-07-20	0.048334750922382	18.85	31.65	25.08
2013-07-21	0	18.95	33.35	26.15
2013-07-22	0.85690841775453	18.65	34.25	26.58
2013-07-23	0	20.35	33.55	26.47
2013-07-24	0	21.45	34.65	26.87
2013-07-25	0	20.85	34.05	27.21
2013-07-26	0	21.65	32.25	26.68
2013-07-27	0	19.65	33.85	27.83
2013-07-28	50.250103946668	21.75	29.75	27.08
2013-07-29	1.0092813451303	18.65	28.35	22.71
2013-07-30	0	18.75	31.25	25.22
2013-07-31	0	20.85	33.15	26.56
2013-08-01	0	17.85	32.35	25.5
2013-08-02	0.083888416359206	17.85	32.35	25.62
2013-08-03	0.16199522794332	20.05	29.85	25.68
2013-08-04	0	20.95	34.35	27.18
2013-08-05	0	21.05	31.35	26.11
2013-08-06	1.2078788722459	20.15	30.75	25.47
2013-08-07	4.8511268129794	18.05	23.55	21.22
2013-08-08	0	17.15	26.45	21.82
2013-08-09	0	18.75	29.65	24.12
2013-08-10	0	20.15	30.35	25.15
2013-08-11	0	20.15	32.05	25.6
2013-08-12	0	20.75	33.35	26.34
2013-08-13	0	19.25	29.75	24.81
2013-08-14	0	19.35	29.85	23.74
2013-08-15	0	19.05	31.05	23.55
2013-08-16	0	17.35	30.65	24.09
2013-08-17	0	17.85	32.65	26.15
2013-08-18	0	20.65	32.55	27.08
2013-08-19	0.1	21.35	29.85	26.6
2013-08-20	0	20.35	29.45	24.54
2013-08-21	0	18.95	31.05	24.49
2013-08-22	0	16.45	30.75	23.35
2013-08-23	0	16.65	31.25	22.49
2013-08-24	0	20.45	29.15	24.83
2013-08-25	0	17.45	26.05	21.6
2013-08-26	0	15.25	26.75	21.12
2013-08-27	0	15.15	27.75	21.59
2013-08-28	0	15.25	27.75	22
2013-08-29	0	18.25	29.55	23.63
2013-08-30	0	18.75	30.65	24.5
2013-08-31	0	18.15	30.25	24.39
2013-09-01	0	20.25	29.55	24.29
2013-09-02	0	18.05	29.05	22.14
2013-09-03	0	18.45	31.75	24.83
2013-09-04	0	15.25	31.25	22.65
2013-09-05	0	14.25	32.25	22.96
2013-09-06	0	16.45	29.65	22.86
2013-09-07	8.2432761791946	18.45	26.95	21.78
2013-09-08	0	16.45	25.45	20.77
2013-09-09	0	12.95	26.35	19.6
2013-09-10	0	15.45	26.25	20.97
2013-09-11	0	12.95	23.95	18.21
2013-09-12	0	11.75	23.35	16.72
2013-09-13	0	13.15	26.45	19.34
2013-09-14	5.1229418221513	13.95	27.95	20.67
2013-09-15	0	14.35	23.45	19.08
2013-09-16	0.12294182215127	12.35	23.15	18.49
2013-09-17	0	14.05	22.25	17.82
2013-09-18	0	10.65	26.15	19.4
2013-09-19	0	13.95	24.85	18.38
2013-09-20	0	13.95	26.55	21.77
2013-09-21	0	15.25	26.75	21.13
2013-09-22	0	17.15	27.25	22.35
2013-09-23	0	12.45	26.35	19.03
2013-09-24	0	9.35	24.75	18.41
2013-09-25	0	16.55	25.65	19.92
2013-09-26	0.29316976148953	17.55	25.05	20.94
2013-09-27	0	17.35	24.85	20.38
2013-09-28	20.468525633189	16.35	23.75	20.04
2013-09-29	7.502579226647	15.15	21.95	18.54
2013-09-30	0	13.55	25.75	20.05
2013-10-01	0	13.95	27.35	20.31
2013-10-02	0	15.05	25.75	20.01
2013-10-03	0	17.15	23.95	20.15
2013-10-04	19.387572753664	16.75	23.35	19.55
2013-10-05	0	15.95	25.15	19.01
2013-10-06	0	13.85	21.95	17.98
2013-10-07	0	14.45	22.75	17.73
2013-10-08	0	11.35	22.65	17.09
2013-10-09	0	12.65	22.45	16.99
2013-10-10	0.1	8.05	20.75	12.69
2013-10-11	0.060946594207941	4.05	16.95	10.52
2013-10-12	0	3.05	16.25	11.05
2013-10-13	0	9.65	21.05	15.26
2013-10-14	0	12.95	21.55	16.59
2013-10-15	0.1	14.65	19.15	16.48
2013-10-16	0	14.65	24.35	18.73
2013-10-17	0.032223167281588	14.05	23.95	17.94
2013-10-18	1.2390534057921	11.05	20.15	16.57
2013-10-19	0	16.55	21.45	18.76
2013-10-20	2.5800477205668	16.15	20.65	17.62
2013-10-21	0	15.75	22.25	18.91
2013-10-22	1.5078788722459	18.15	22.55	20.7
2013-10-23	0.45411635569747	15.65	22.95	20.06
2013-10-24	0	13.45	21.05	17.7
2013-10-25	0	15.65	23.25	19.44
2013-10-26	0	15.35	24.35	19.25
2013-10-27	0.47127657307365	14.75	24.35	19.7
2013-10-28	0	14.85	24.35	18.53
2013-10-29	0.016111583640794	12.85	18.75	15.1
2013-10-30	0	11.55	16.85	13.58
2013-10-31	0	10.35	16.25	12.76
2013-11-01	0	7.15	19.75	13.43
2013-11-02	0.35411635569747	14.25	20.95	16.92
2013-11-03	0	9.65	18.55	14.2
2013-11-04	2.3089275059812	9.45	14.45	11.47
2013-11-05	0.23222316728159	8.25	12.45	10.43
2013-11-06	0	8.25	22.75	13.1
2013-11-07	0	11.25	24.95	17.79
2013-11-08	16.190180218772	11.25	17.95	14.49
2013-11-09	0	11.15	17.05	14.16
2013-11-10	0	7.75	17.65	13.45
2013-11-11	0	7.65	14.45	10.46
2013-11-12	0	7.25	15.05	10.23
2013-11-13	0	9.25	12.05	10.97
2013-11-14	0	5.95	14.85	9.93
2013-11-15	0.060946594207941	6.65	9.95	8.12
2013-11-16	0	6.45	12.05	8.14
2013-11-17	4.68598568383	6.25	11.45	8.54
2013-11-18	41.100340955437	9.05	10.05	9.69
2013-11-19	1.9150629499054	4.65	10.45	8.94
2013-11-20	0	2.35	7.55	5.68
2013-11-21	0	1.35	10.75	5.2
2013-11-22	0	1.55	7.05	3.8
2013-11-23	0	0.95000000000005	8.55	5.94
2013-11-24	0	7.95	10.45	9.13
2013-11-25	0	3.95	9.85	7.22
2013-11-26	0	2.65	7.55	4.62
2013-11-27	0	1.05	5.45	2.72
2013-11-28	0	-0.25	6.05	2.44
2013-11-29	0	0.35000000000002	8.45	3.5
2013-11-30	0.061995227943324	0.95000000000005	10.05	6.0700000000001
2013-12-01	0	4.25	8.15	5.8
2013-12-02	0	3.75	9.15	6.05
2013-12-03	0	0.35000000000002	14.65	5.85
2013-12-04	0	2.85	17.55	9.19
2013-12-05	0	4.25	10.65	7.18
2013-12-06	0	5.45	13.15	8.8
2013-12-07	0	5.15	10.05	7.5700000000001
2013-12-08	0	1.25	11.95	5.94
2013-12-09	0	-0.84999999999997	12.05	3.59
2013-12-10	0	-2.05	11.25	3.5
2013-12-11	0	3.45	9.85	6.54
2013-12-12	0	6.75	12.25	8.87
2013-12-13	0	4.25	12.35	8.79
2013-12-14	0	2.05	14.55	7.41
2013-12-15	0	3.25	14.75	8
2013-12-16	0	0.65000000000003	12.65	5.17
2013-12-17	0	2.65	13.25	6.8
2013-12-18	1.0770581778487	6.95	11.85	9.81
2013-12-19	31.17197136766	10.35	12.95	11.65
2013-12-20	3.9031459012061	7.85	9.35	8.52
2013-12-21	0.88388841635921	7.15	12.35	9.3
2013-12-22	0	8.65	14.25	11.15
2013-12-23	0	7.45	12.65	9.75
2013-12-24	4.0712765730736	12.15	14.25	13.19
2013-12-25	7.4201368763823	9.65	15.35	13.26
2013-12-26	0	6.55	11.85	8.81
2013-12-27	0.77705817784873	3.25	13.35	6.98
2013-12-28	3.6504320183931	4.45	12.75	8.83
2013-12-29	0	2.75	12.25	6.58
2013-12-30	0	1.85	10.65	5.97
2013-12-31	0.077058177848735	-1.45	10.15	4.9
2014-01-01	0.78388841635921	6.25	12.05	8.88
2014-01-02	0.27705817784873	7.75	15.45	11.55
2014-01-03	2.2229418221513	8.45	13.05	10.81
2014-01-04	3.6917672886051	7.35	13.75	11.09
2014-01-05	0	5.25	12.45	8.18
2014-01-06	0	4.05	13.85	8.2
2014-01-07	0	8.55	13.35	11.02
2014-01-08	0	9.75	14.25	11.6
2014-01-09	0	9.15	13.85	11.08
2014-01-10	0	7.75	12.35	9.7
2014-01-11	0.1	8.15	12.55	10.29
2014-01-12	0.1	7.45	13.25	10
2014-01-13	18.36324134234	7.35	11.75	9.89
2014-01-14	0.04588364430253	2.15	10.45	6.35
2014-01-15	3.0068302385105	2.65	10.85	6.14
2014-01-16	7.0875727536635	2.85	13.25	8.14
2014-01-17	0.92189318841588	9.15	14.45	10.7
2014-01-18	45.447442475675	9.15	11.95	10.5
2014-01-19	27.542737743096	8.15	11.75	10.04
2014-01-20	0	5.55	11.45	7.87
2014-01-21	0	3.95	11.55	7.25
2014-01-22	0	0.050000000000011	9.95	5.22
2014-01-23	0	4.45	13.15	7.75
2014-01-24	0	4.85	8.15	6
2014-01-25	0	2.65	11.65	6.34
2014-01-26	0	3.05	12.75	8.22
2014-01-27	0	8.55	10.95	9.92
2014-01-28	0.38493705009459	0.95000000000005	10.05	5.18
2014-01-29	11.529587463713	3.05	7.95	5.3
2014-01-30	10.376009544113	4.15	5.85	4.95
2014-01-31	0.81611158364079	2.85	10.95	5.93
2014-02-01	13.239053405792	1.95	8.85	5.48
2014-02-02	0	4.35	11.05	6.96
2014-02-03	3.3677768327184	1.15	11.45	6.67
2014-02-04	6.4043791318906	4.25	11.95	7.3200000000001
2014-02-05	13.855688070782	2.75	10.45	8.01
2014-02-06	2.4260877233574	-0.44999999999999	13.25	6.58
2014-02-07	16.32136763603	3.75	13.85	10.63
2014-02-08	1.472325206809	1.75	12.75	7.72
2014-02-09	12.426087723357	4.05	11.75	8.23
2014-02-10	18.368471627305	6.75	12.45	9.6
2014-02-11	0	3.75	13.15	8.11
2014-02-12	0	3.85	14.95	8.23
2014-02-13	0.46094659420794	3.65	15.15	8.3200000000001
2014-02-14	0	4.45	13.35	9.15
2014-02-15	3.2640924954141	10.55	15.55	13.69
2014-02-16	0.26199522794332	7.35	12.75	9.81
2014-02-17	0	4.45	14.25	8.23
2014-02-18	0.82294182215126	4.75	14.25	10.06
2014-02-19	0	8.25	17.05	11.89
2014-02-20	0.5688254664538	6.35	16.85	10.67
2014-02-21	0.42294182215126	5.45	13.25	10.08
2014-02-22	0	2.75	16.15	8.72
2014-02-23	0	2.65	16.45	8.9
2014-02-24	0	4.55	14.65	10.17
2014-02-25	7.777752972435	7.55	12.45	10.11
2014-02-26	2.2921211277541	3.65	9.95	7.3200000000001
2014-02-27	0.27705817784873	1.75	12.35	6.55
2014-02-28	2.4390534057921	3.45	12.05	6.38
2014-03-01	0	3.65	12.75	7.63
2014-03-02	17.117683298725	4.15	14.65	8.76
2014-03-03	0	4.85	13.55	7.98
2014-03-04	0	3.05	12.45	8.34
2014-03-05	0	6.65	15.55	10.79
2014-03-06	0	8.15	17.35	11.51
2014-03-07	0	3.65	20.65	11.57
2014-03-08	0	7.75	20.65	12.93
2014-03-09	0	2.85	19.05	10.65
2014-03-10	0	2.15	20.35	10.25
2014-03-11	0	4.85	16.65	10.07
2014-03-12	0	4.05	17.95	10.54
2014-03-13	0	2.95	19.85	11.12
2014-03-14	0	4.35	21.55	12.65
2014-03-15	0	8.15	21.25	14.64
2014-03-16	0	11.95	22.95	17.08
2014-03-17	0	9.45	24.35	16.81
2014-03-18	0	9.25	19.35	13.4
2014-03-19	0	10.15	20.05	14.51
2014-03-20	0	5.95	18.15	12.62
2014-03-21	0.30683023851047	10.75	16.15	13.2
2014-03-22	9.1292336245636	7.95	13.95	11.8
2014-03-23	1.0537625165484	5.25	12.75	8.65
2014-03-24	0	4.65	13.85	9.25
2014-03-25	3.0161115836408	5.55	13.15	9.11
2014-03-26	0	5.85	15.75	10.5
2014-03-27	0	3.85	17.35	10.71
2014-03-28	0	2.15	16.45	9.7
2014-03-29	0	5.75	20.85	13
2014-03-30	0	8.85	18.05	12.7
2014-03-31	0	5.45	18.25	12.19
2014-04-01	0	9.05	16.15	12.61
2014-04-02	0	9.15	20.45	14.84
2014-04-03	0.1	12.95	18.25	15.46
2014-04-04	0	11.85	21.75	16.53
2014-04-05	0	12.85	21.45	16.78
2014-04-06	0	12.25	23.65	17.29
2014-04-07	0	9.65	23.45	16.17
2014-04-08	4.2619952279433	11.45	21.35	15.17
2014-04-09	0	11.45	22.05	16.35
2014-04-10	0	11.35	24.25	16.7
2014-04-11	0	10.35	19.45	14.49
2014-04-12	0	12.15	21.95	16.36
2014-04-13	0	13.75	24.35	18.36
2014-04-14	0	13.15	25.25	18.57
2014-04-15	0	12.25	22.05	16.45
2014-04-16	0	8.25	19.75	13.83
2014-04-17	0	5.65	20.15	13.09
2014-04-18	0	7.25	21.45	15.09
2014-04-19	0	8.95	18.55	13.4
2014-04-20	6.7688254664538	8.25	11.95	10.3
2014-04-21	2.3712919278227	9.45	17.65	13.07
2014-04-22	1.8071840776596	10.85	17.05	14.17
2014-04-23	0	10.25	23.25	16.51
2014-04-24	2.2288926691264	9.85	24.85	17.28
2014-04-25	3.5630438616787	10.95	18.55	14.53
2014-04-26	3.7469322780379	9.95	20.85	15.05
2014-04-27	0	9.75	19.45	14.39
2014-04-28	0.12294182215127	10.35	19.15	14.41
2014-04-29	0	10.85	23.35	16.88
2014-04-30	0	10.95	20.85	16.06
2014-05-01	0	9.85	23.35	16.53
2014-05-02	0.29421839522491	12.35	19.15	16.31
2014-05-03	0	12.35	19.55	15.83
2014-05-04	0	10.55	19.25	14.76
2014-05-05	0	10.55	22.85	16.24
2014-05-06	0	7.95	20.65	14.83
2014-05-07	0	13.65	23.95	17.84
2014-05-08	0	13.05	25.95	18.79
2014-05-09	0	11.75	29.85	21.45
2014-05-10	0	15.65	25.25	20.68
2014-05-11	0	15.25	23.15	19.02
2014-05-12	0	13.05	22.15	17.37
2014-05-13	0.022941822151265	10.95	20.85	15.73
2014-05-14	0	9.55	21.35	15.74
2014-05-15	0	12.45	20.55	16.24
2014-05-16	0	10.85	21.35	16.5
2014-05-17	0.032223167281588	13.35	26.25	18.76
2014-05-18	3.0448350105671	11.85	22.95	17.05
2014-05-19	0.16777683271841	12.85	18.45	15.64
2014-05-20	1.4619952279433	14.45	22.85	18.53
2014-05-21	0.18388841635921	15.95	25.75	20.61
2014-05-22	1.1609465942079	15.85	19.45	18.32
2014-05-23	4.5520190882267	8.35	22.05	16.47
2014-05-24	0	7.45	23.45	15.6
2014-05-25	0	10.85	22.65	16.25
2014-05-26	0.022941822151265	9.65	21.15	15.19
2014-05-27	0	12.05	21.75	16.97
2014-05-28	0	10.25	24.85	17.78
2014-05-29	0	13.75	25.55	19.96
2014-05-30	0.82872342692635	15.15	26.65	19.66
2014-05-31	0	17.15	25.85	21.55
2014-06-01	0	15.35	26.75	21.22
2014-06-02	0	15.15	24.95	20.55
2014-06-03	0	15.25	28.05	21.79
2014-06-04	0.33800477205668	15.55	23.05	18.77
2014-06-05	0	12.05	25.35	17.12
2014-06-06	0	12.45	26.85	20.3
2014-06-07	0	14.95	28.95	22.04
2014-06-08	0	14.75	31.25	24.45
2014-06-09	0	16.15	33.05	25.5
2014-06-10	0	16.75	34.55	26.17
2014-06-11	0	23.65	35.45	29.64
2014-06-12	0	22.35	36.85	28.64
2014-06-13	4.2919518855541	21.85	34.25	26.28
2014-06-14	0	20.65	31.55	26.05
2014-06-15	4.0598979604726	16.55	24.05	20.15
2014-06-16	0	17.55	29.05	23.1
2014-06-17	17.190008505534	15.15	27.45	20.9
2014-06-18	5.661638917757	14.75	23.45	17.84
2014-06-19	0	13.75	27.15	20.82
2014-06-20	0	17.05	32.25	24.43
2014-06-21	0	19.45	30.55	24.43
2014-06-22	0	17.55	28.75	23.18
2014-06-23	0	18.35	29.65	23.62
2014-06-24	16.314524513807	22.55	32.15	27.39
2014-06-25	0.90104863373538	16.75	27.95	21.45
2014-06-26	0	19.05	31.15	25.32
2014-06-27	0	18.25	29.35	24.35
2014-06-28	2.4921211277541	18.35	27.25	23.14
2014-06-29	0	17.95	25.75	20.91
2014-06-30	0	15.75	26.85	20.5
2014-07-01	0.72294182215126	16.45	27.35	21.72
2014-07-02	0	19.25	28.65	23.85
2014-07-03	0	16.65	29.65	22.55
2014-07-04	17.335876795088	18.65	27.35	23.23
2014-07-05	0.022941822151265	17.25	30.55	23.62
2014-07-06	1.666728198983	19.25	27.85	23.27
2014-07-07	23.692998048252	16.65	20.65	18.57
2014-07-08	0	13.55	24.25	19.96
2014-07-09	0.16094659420794	17.25	23.75	20.95
2014-07-10	0	16.15	22.75	19.51
2014-07-11	0	17.25	26.25	21.84
2014-07-12	0	16.65	26.35	20.68
2014-07-13	1.0103299788657	16.85	27.35	23.12
2014-07-14	0	18.05	29.85	22.93
2014-07-15	0	19.45	30.95	25.39
2014-07-16	0	19.35	33.75	25.96
2014-07-17	0	19.45	33.25	24.66
2014-07-18	0	20.05	30.95	24.93
2014-07-19	0	20.25	31.35	26.47
2014-07-20	9.8143681553191	18.15	29.45	23.05
2014-07-21	0	17.25	27.55	22.82
2014-07-22	0	19.65	27.55	23.93
2014-07-23	0	20.45	31.55	25.08
2014-07-24	5.2900238602834	19.55	31.35	24.5
2014-07-25	11.049042429221	17.65	24.75	20.76
2014-07-26	0	16.75	29.15	22.78
2014-07-27	0	19.05	30.95	24.82
2014-07-28	2.0679460749184	17.45	26.85	22.46
2014-07-29	0	15.45	22.65	19.08
2014-07-30	0	16.15	29.05	23.19
2014-07-31	0	21.65	31.75	27.06
2014-08-01	0	19.85	30.35	24.65
2014-08-02	4.9798348851567	19.65	27.35	23.11
2014-08-03	0	17.85	28.35	22.6
2014-08-04	0	19.55	27.55	22.93
2014-08-05	0	18.95	29.25	23.93
2014-08-06	0	18.05	31.15	24.68
2014-08-07	0	20.55	31.75	25.53
2014-08-08	5.8894854241852	20.05	30.95	25.05
2014-08-09	0	18.55	28.75	23.17
2014-08-10	0.23905340579206	20.05	29.45	23.58
2014-08-11	0	19.95	31.55	25.85
2014-08-12	7.1	18.15	23.25	19.28
2014-08-13	0.94588364430253	16.25	25.15	21.92
2014-08-14	0	14.25	26.45	21.49
2014-08-15	0	16.55	26.35	21.09
2014-08-16	0	15.65	25.95	20.59
2014-08-17	0	14.95	28.05	21.05
2014-08-18	3.2	13.45	27.85	20.82
2014-08-19	0	19.05	27.15	22.28
2014-08-20	0	16.25	27.25	21.19
2014-08-21	0	15.65	27.45	20.97
2014-08-22	0.33800477205668	13.95	25.15	18.76
2014-08-23	0	16.75	26.75	22.07
2014-08-24	0	15.55	25.55	20.31
2014-08-25	0	13.85	27.85	20.54
2014-08-26	0.32294182215126	19.45	28.25	23.57
2014-08-27	0	19.75	31.05	24.41
2014-08-28	0	18.25	33.15	25.06
2014-08-29	0	18.45	30.85	23.43
2014-08-30	0	19.85	29.35	24.79
2014-08-31	0	18.35	30.05	23.58
2014-09-01	0	17.75	26.55	21.88
2014-09-02	0	17.75	27.85	22.23
2014-09-03	0	16.65	28.05	21.69
2014-09-04	0	13.45	28.55	20.87
2014-09-05	0	17.05	29.75	21.61
2014-09-06	0	16.45	30.55	23.74
2014-09-07	0	16.15	29.15	23.03
2014-09-08	3.9122426493874	18.75	26.55	23.08
2014-09-09	0	15.85	30.15	22.57
2014-09-10	0.52294182215127	18.25	31.45	24.41
2014-09-11	0	18.55	29.65	23.3
2014-09-12	0	16.95	27.35	21.41
2014-09-13	0	17.55	28.25	22.1
2014-09-14	0.022941822151265	16.05	28.25	21.42
2014-09-15	17.824626302514	16.65	25.45	19.87
2014-09-16	0	14.55	25.35	19.82
2014-09-17	21.090575180093	17.75	25.25	21.11
2014-09-18	4.8229418221513	17.35	25.65	21.3
2014-09-19	0.97705817784874	19.95	26.95	22.89
2014-09-20	0	17.35	27.25	22.36
2014-09-21	0	16.65	28.85	21.99
2014-09-22	0.1	16.75	23.75	19.73
2014-09-23	1.6415045124119	14.55	23.05	18.02
2014-09-24	26.072876526619	12.75	17.75	15.47
2014-09-25	0	11.35	21.25	16.36
2014-09-26	0	13.05	24.25	17.9
2014-09-27	0	11.35	25.55	17.76
2014-09-28	0	12.15	25.85	18.81
2014-09-29	13.013334876333	17.25	21.75	19.31
2014-09-30	0	16.55	21.65	18.63
2014-10-01	0	15.25	27.25	20.84
2014-10-02	0	16.15	25.55	20.49
2014-10-03	0	13.55	26.45	19.29
2014-10-04	0	13.75	25.35	20.12
2014-10-05	0	11.95	23.05	17.6
2014-10-06	6.0528702413011	9.55	20.65	15.93
2014-10-07	20.768517502986	17.75	22.05	20.05
2014-10-08	8.9150629499054	19.05	24.25	21.45
2014-10-09	0.38283978262382	17.45	24.65	21.26
2014-10-10	1.4791554453195	19.35	23.95	21.51
2014-10-11	0.18388841635921	17.05	24.65	20.13
2014-10-12	0.78721891451444	16.45	23.75	20.66
2014-10-13	0.70647639936139	17.05	24.15	20.89
2014-10-14	0.70647639936139	15.55	22.05	18.23
2014-10-15	0	13.95	23.45	19.17
2014-10-16	0.5	14.75	24.55	18.67
2014-10-17	0	15.95	27.55	20.62
2014-10-18	0	15.35	24.85	20.24
2014-10-19	0	16.25	25.45	19.88
2014-10-20	0.1	15.15	23.65	18.31
2014-10-21	0	16.55	25.25	20.37
2014-10-22	0	10.15	16.55	13.33
2014-10-23	0.84483501056715	11.45	17.65	14.93
2014-10-24	0	12.15	20.45	15.17
2014-10-25	0	12.35	23.25	17.25
2014-10-26	0	11.65	20.95	16.2
2014-10-27	0	10.45	19.85	16.01
2014-10-28	0	10.05	19.15	14.33
2014-10-29	0	8.05	20.75	14.51
2014-10-30	0	7.25	20.15	12.79
2014-10-31	0	6.95	20.55	12.58
2014-11-01	0	8.35	19.45	13.15
2014-11-02	0	13.35	19.95	16.46
2014-11-03	1.6161115836408	14.55	19.45	17.23
2014-11-04	18.180019482106	10.45	18.25	15.17
2014-11-05	0	7.45	14.75	10.43
2014-11-06	0	6.35	14.85	9.66
2014-11-07	0	3.55	16.55	9.73
2014-11-08	8.3365869444231	6.35	17.75	11.92
2014-11-09	12.035228064749	10.45	13.75	12.39
2014-11-10	4.1677768327184	10.45	17.55	12.95
2014-11-11	15.52557752572	11.75	17.45	14.01
2014-11-12	2.5493833846578	8.35	16.55	12.88
2014-11-13	0	6.75	18.35	11.1
2014-11-14	19.897561777092	6.45	17.85	13.46
2014-11-15	1.3448350105671	8.05	15.65	11.57
2014-11-16	0.23905340579206	4.25	15.55	10.11
2014-11-17	0.46094659420794	5.75	13.65	9.69
2014-11-18	0	4.15	16.95	8.96
2014-11-19	0	3.65	15.75	8.6
2014-11-20	0	5.65	12.15	9.2
2014-11-21	0	10.75	15.75	13.03
2014-11-22	0	13.65	17.35	15.08
2014-11-23	0	13.15	19.25	15.15
2014-11-24	18.034689628651	11.95	18.15	14.47
2014-11-25	24.268612631044	13.55	15.15	14.28
2014-11-26	51.813816835509	12.85	14.55	13.76
2014-11-27	43.77897084837	12.45	17.65	14.55
2014-11-28	0.78388841635921	12.55	17.65	15.65
2014-11-29	13.22101379688	11.75	18.35	15.77
2014-11-30	4.3688254664538	11.05	13.25	12.05
2014-12-01	7.1183934480606	6.65	10.75	7.9
2014-12-02	0	6.45	11.05	7.97
2014-12-03	0.91611158364079	5.85	7.85	6.87
2014-12-04	5.5551649894329	4.25	10.35	7.36
2014-12-05	17.198951366265	6.45	9.15	8.13
2014-12-06	0.022941822151265	5.65	8.15	6.74
2014-12-07	0	5.75	10.85	8.06
2014-12-08	0	4.85	10.65	7.02
2014-12-09	0	5.05	7.85	6.31
2014-12-10	0	3.65	10.65	6.9
2014-12-11	0	3.15	13.15	7.68
2014-12-12	0	-0.44999999999999	10.25	5.41
2014-12-13	0	10.05	15.25	12.5
2014-12-14	0.29071865486968	9.95	15.25	12.29
2014-12-15	1.2838884163592	8.45	14.85	11.44
2014-12-16	0	9.05	14.65	11.17
2014-12-17	2.7161115836408	6.65	9.25	8.1
2014-12-18	0	6.25	17.45	12.03
2014-12-19	0	8.75	17.55	12.23
2014-12-20	0	7.75	17.05	11.25
2014-12-21	0	6.85	12.75	9
2014-12-22	0	0.75	13.55	6.63
2014-12-23	0	-1.75	10.55	5.29
2014-12-24	0	8.35	9.05	8.8200000000001
2014-12-25	0	5.45	15.15	10.11
2014-12-26	0	3.75	7.15	6.08
2014-12-27	1.0770581778487	2.25	9.15	5.5
2014-12-28	0	0.65000000000003	6.65	3.33
2014-12-29	0	0.15000000000003	5.15	2.13
2014-12-30	0	2.25	7.15	5.08
2014-12-31	0	2.95	6.55	4.65
2015-01-01	0	1.35	8.35	3.86
2015-01-02	0	0.25	14.05	7.08
2015-01-03	0	6.15	18.15	11.58
2015-01-04	0	8.25	17.75	12.84
2015-01-05	0	1.25	11.85	6.24
2015-01-06	0	-0.54999999999995	12.65	4.5
2015-01-07	0	2.85	13.05	7.16
2015-01-08	0	2.35	13.85	7.28
2015-01-09	0	6.25	16.95	11
2015-01-10	0	6.35	21.25	12.9
2015-01-11	0	6.75	12.65	10.48
2015-01-12	0	1.15	13.95	6.15
2015-01-13	0	2.05	15.25	9.34
2015-01-14	0	4.65	15.55	10.33
2015-01-15	11.243601779883	6.65	14.15	12.19
2015-01-16	11.951480652129	7.35	14.05	11.81
2015-01-17	0	2.05	11.45	6.6
2015-01-18	15.29316976149	-0.94999999999999	8.55	4.09
2015-01-19	23.749042429221	4.95	8.05	6.63
2015-01-20	9.9103299788657	3.45	5.65	4.66
2015-01-21	26.697364296431	2.95	4.55	4.03
2015-01-22	0	2.45	9.35	4.68
2015-01-23	0	2.25	6.95	4.39
2015-01-24	0	3.85	9.25	5.59
2015-01-25	0	4.55	7.85	5.89
2015-01-26	0	3.15	8.75	5.7
2015-01-27	0	2.55	10.35	5.87
2015-01-28	0	3.35	11.55	6.4
2015-01-29	1.8297720606617	3.95	11.65	7.6
2015-01-30	0	2.05	10.25	6.39
2015-01-31	0	0.85000000000002	10.95	4.91
2015-02-01	0	0.75	9.35	3.9
2015-02-02	0	-0.84999999999997	9.55	3.05
2015-02-03	1.6204907155314	-1.75	3.25	1.2
2015-02-04	0.13905340579206	1.85	3.95	3.08
2015-02-05	0	2.05	3.15	2.56
2015-02-06	0	1.05	5.75	3.08
2015-02-07	0	0.65000000000003	7.85	3.49
2015-02-08	0	0.45000000000005	9.05	4.8200000000001
2015-02-09	0	2.55	10.35	5.68
2015-02-10	0	-0.14999999999998	12.05	5.33
2015-02-11	0	-1.95	14.25	4.38
2015-02-12	0	0.65000000000003	14.05	6.8
2015-02-13	3.8029870716808	6.45	12.45	9.54
2015-02-14	4.1218931884159	4.75	10.45	8.15
2015-02-15	15.721893188416	4.75	8.15	6.6
2015-02-16	0	4.65	13.05	8.14
2015-02-17	0.64833475092238	6.05	10.95	7.69
2015-02-18	0	2.95	11.15	7.16
2015-02-19	0	-0.64999999999998	14.75	5.8200000000001
2015-02-20	2.3828397826238	-0.049999999999955	12.15	6.35
2015-02-21	2.5619952279433	3.45	10.75	8.25
2015-02-22	0	2.65	10.35	6.09
2015-02-23	0	1.45	12.85	7.22
2015-02-24	0	5.75	13.05	9.09
2015-02-25	0	7.45	13.75	9.88
2015-02-26	5.7126118432856	6.35	14.15	9.96
2015-02-27	8.6873881567144	5.35	12.15	7.72
2015-02-28	0.73222316728159	3.95	11.75	6.88
2015-03-01	0.72294182215126	4.05	9.95	6.98
2015-03-02	0	6.95	19.15	12.54
2015-03-03	0	6.75	17.75	11.92
2015-03-04	0	7.35	11.65	9.44
2015-03-05	0	6.95	12.55	9.89
2015-03-06	0	5.75	14.95	10.63
2015-03-07	0	5.65	17.15	10.6
2015-03-08	0	0.95000000000005	16.55	8.59
2015-03-09	0	4.85	18.05	9.69
2015-03-10	0	4.65	20.15	11.06
2015-03-11	0	7.95	21.55	14.49
2015-03-12	0	7.15	17.85	12.49
2015-03-13	0	6.45	16.95	11.58
2015-03-14	5.9103299788657	6.85	14.25	10.33
2015-03-15	17.282839782624	6.35	8.25	7.53
2015-03-16	3.005427765626	7.75	13.75	10.09
2015-03-17	0.26094659420794	8.25	13.35	10.5
2015-03-18	0	8.25	18.45	12.62
2015-03-19	0.92294182215127	6.15	19.55	11.97
2015-03-20	0.92294182215127	9.35	17.95	12.99
2015-03-21	3.3229418221513	9.45	14.15	11.24
2015-03-22	0	7.85	11.75	9.34
2015-03-23	0	6.45	18.05	11.72
2015-03-24	12.257616096053	8.75	15.35	12.53
2015-03-25	5.6942183952249	6.75	11.15	8.47
2015-03-26	0	5.75	15.75	10.15
2015-03-27	0	5.35	17.95	11.84
2015-03-28	0	9.25	20.85	15.99
2015-03-29	0	9.55	20.05	15.2
2015-03-30	0	13.05	15.15	13.92
2015-03-31	0	12.35	20.75	17.42
2015-04-01	0	9.05	16.35	12.63
2015-04-02	0	7.15	8.65	7.75
2015-04-03	0	10.65	20.45	15.97
2015-04-04	0.38388841635921	9.45	19.05	15.07
2015-04-05	0	7.85	10.05	8.58
2015-04-06	0	6.35	16.15	12.43
2015-04-07	0	6.95	16.75	11.41
2015-04-08	0	3.05	19.15	10.8
2015-04-09	0	3.45	18.95	11
2015-04-10	0	3.85	6.25	4.87
2015-04-11	0	4.75	20.75	14.53
2015-04-12	0	5.85	8.25	6.95
2015-04-13	0	7.65	25.95	18.6
2015-04-14	0	11.05	28.35	20.81
2015-04-15	0	8.65	23.05	15.43
2015-04-16	8.9654949682986	11.25	12.35	11.87
2015-04-17	3.3031459012061	12.05	19.75	15.63
2015-04-18	0.016111583640794	10.75	20.65	17.39
2015-04-19	21.085462602481	11.85	13.65	12.93
2015-04-20	0	11.65	12.95	12.2
2015-04-21	0.2	10.75	22.95	18.09
2015-04-22	0	10.45	21.45	15.47
2015-04-23	0	12.55	22.95	17.67
2015-04-24	1.7551649894329	11.95	24.35	17.91
2015-04-25	14.134845987139	13.95	15.15	14.63
2015-04-26	43.604407370352	13.65	18.15	15.86
2015-04-27	27.561100481659	11.55	14.75	13.26
2015-04-28	0.039053405792059	10.25	17.35	13.08
2015-04-29	0	9.05	17.75	14.43
2015-04-30	0	7.85	20.55	14.85
2015-05-01	1.3322231672816	14.85	17.85	16.09
2015-05-02	0	14.55	22.35	18.54
2015-05-03	0	15.05	21.75	18.08
2015-05-04	0	16.05	22.35	18.59
2015-05-05	0	15.65	21.35	18.61
2015-05-06	0	14.85	26.75	20.38
2015-05-07	0	13.25	24.85	18.14
2015-05-08	0.022941822151265	11.65	22.75	17.03
2015-05-09	0	14.15	26.35	20.3
2015-05-10	0	15.45	28.65	21.45
2015-05-11	0	13.25	25.75	19.33
2015-05-12	0	12.65	24.55	18.1
2015-05-13	0	13.25	23.15	18.27
2015-05-14	0	15.55	29.15	21.55
2015-05-15	1.1921211277541	12.25	18.65	14.29
2015-05-16	0	13.95	23.25	18.65
2015-05-17	0	16.55	25.25	20.4
2015-05-18	0.32294182215126	14.05	26.15	19.45
2015-05-19	1.0838884163592	13.65	22.05	17.33
2015-05-20	0	10.85	19.15	15.26
2015-05-21	0	9.95	19.35	15.38
2015-05-22	0	13.65	22.35	18.1
2015-05-23	0	16.65	22.45	19.93
2015-05-24	0	13.15	16.25	14.43
2015-05-25	0	17.55	25.95	22.63
2015-05-26	0	14.35	22.05	19.17
2015-05-27	0	13.55	23.75	18.48
2015-05-28	0	13.65	27.85	19.87
2015-05-29	0.022941822151265	14.65	24.15	19.45
2015-05-30	0	16.05	28.25	22.08
2015-05-31	0	16.05	26.85	21.29
2015-06-01	0	13.45	26.15	20.31
2015-06-02	0	15.75	28.85	21.93
2015-06-03	0	15.95	30.15	22.98
2015-06-04	0	17.05	29.95	23.47
2015-06-05	0	17.45	31.45	24.4
2015-06-06	0	16.65	33.75	26
2015-06-07	0	22.15	33.55	26.58
2015-06-08	0	21.25	31.35	25.92
2015-06-09	0.5	19.25	29.55	23.53
2015-06-10	0	17.85	25.45	22.02
2015-06-11	1.5204907155314	17.85	29.05	23.39
2015-06-12	32.404025292742	15.55	20.95	18.58
2015-06-13	0.20683023851047	14.85	25.95	20.65
2015-06-14	7.6604363965707	18.05	24.25	21.21
2015-06-15	0	16.65	26.95	22.29
2015-06-16	3.9462374834516	18.25	24.65	20.53
2015-06-17	0	18.85	26.75	22.56
2015-06-18	0	18.95	29.35	23.88
2015-06-19	0	19.25	27.35	23.55
2015-06-20	0	19.45	27.45	22.98
2015-06-21	0	18.95	28.85	23.8
2015-06-22	0	17.75	29.85	23.71
[truncated: 2,290 more rows]

## Sheet: weather data 2016-2019
2016
DATE	2016-01-01	2016-01-02	2016-01-03	2016-01-04	2016-01-05	2016-01-06	2016-01-07	2016-01-08	2016-01-09	2016-01-10	2016-01-11	2016-01-12	2016-01-13	2016-01-14	2016-01-15	2016-01-16	2016-01-17	2016-01-18	2016-01-19	2016-01-20	2016-01-21	2016-01-22	2016-01-23	2016-01-24	2016-01-25	2016-01-26	2016-01-27	2016-01-28	2016-01-29	2016-01-30	2016-01-31	2016-02-01	2016-02-02	2016-02-03	2016-02-04	2016-02-05	2016-02-06	2016-02-07	2016-02-08	2016-02-09	2016-02-10	2016-02-11	2016-02-12	2016-02-13	2016-02-14	2016-02-15	2016-02-16	2016-02-17	2016-02-18
RAINFALL	7.703145901	1.976009544	1.383888416	0	0	2.101048634	0.1	0.022941822	0.322941822	0	0.2	0.1	0.039053406	0	0	0	0	7.829772061	1.209281345	0	0	0.739053406	0	0	0	0	0	0	0	0	0	0	0	0	0	0	6.655334232	14.12223414	0	6.373912277	0	0.177058178	7.824344295	3.894218395	0	0	0	0	0
MIN-T	8.25	6.35	3.95	4.85	5.05	3.05	3.15	5.85	5.85	8.35	7.35	3.85	1.55	2.45	2.15	2.05	0.45	1.05	2.65	3.35	0.35	-1.35	4.55	0.95	6.05	7.95	8.95	10.95	8.15	4.85	9.05	9.75	7.95	7.25	4.35	3.45	6.05	4.35	1.65	6.25	3.35	1.05	2.45	1.65	6.55	5.75	4.85	0.25	1.85
MAX-T	12.05	13.05	11.05	11.55	10.95	13.05	11.15	13.65	13.05	15.55	14.65	12.95	11.15	6.75	9.85	7.95	8.25	4.15	8.45	8.85	3.05	9.35	15.55	12.75	10.65	12.65	12.05	13.65	17.85	14.75	17.05	19.95	16.65	15.65	13.05	17.45	13.75	12.85	16.65	12.75	10.75	10.25	9.45	13.55	14.95	10.35	10.15	10.35	10.75
MEAN-T	10.2	10.36	6.68	7.74	7.71	6.56	6.72	8.47	9.71	10.57	10.85	8.19	4.93	4.17	4.87	4.78	3.73	2.65	4.85	5.85	1.92	5.69	8.08	7.4	8.59	10.58	10.68	12.43	12.1	9.76	14.28	14.6	11.35	11.1	8.13	9.39	10.49	9.45	9.27	9.44	6.97	5.73	5.02	7.47	10.18	7.84	6.72	4.64	5.8
2017
	2017-01-01	2017-01-02	2017-01-03	2017-01-04	2017-01-05	2017-01-06	2017-01-07	2017-01-08	2017-01-09	2017-01-10	2017-01-11	2017-01-12	2017-01-13	2017-01-14	2017-01-15	2017-01-16	2017-01-17	2017-01-18	2017-01-19	2017-01-20	2017-01-21	2017-01-22	2017-01-23	2017-01-24	2017-01-25	2017-01-26	2017-01-27	2017-01-28	2017-01-29	2017-01-30	2017-01-31	2017-02-01	2017-02-02	2017-02-03	2017-02-04	2017-02-05	2017-02-06	2017-02-07	2017-02-08	2017-02-09	2017-02-10	2017-02-11	2017-02-12	2017-02-13	2017-02-14	2017-02-15	2017-02-16	2017-02-17	2017-02-18
RAINFALL	0	0	0	0	0	0	0	0	0	2.022941822	0	0	0	0.060946594	0	0	0	0	0	0	0	2.34010204	0	0	6.991072494	18.74744248	0	2.661825986	0	0.755164989	0.5	0	4.898256572	1.163397701	4.775301866	2.683888416	0	0	0	0.960946594	0.139053406	0	0	0.022941822	0	0.955164989	0	0	0
MIN-T	0.55	1.45	1.45	-0.15	3.85	0.45	-1.25	4.05	-0.25	-0.65	0.25	-0.05	2.25	0.55	0.75	0.45	-0.75	-1.15	-2.25	-3.25	-1.15	1.95	1.55	-0.45	-1.55	0.05	7.45	8.25	3.05	2.35	8.45	8.55	8.25	2.85	4.05	7.35	7.65	6.15	6.65	4.95	2.65	5.75	7.25	12.65	11.25	9.95	7.75	5.75	6.35
MAX-T	10.55	12.05	6.95	10.45	8.35	4.85	6.45	8.35	7.05	7.75	11.35	14.25	9.75	8.25	7.25	6.65	3.25	3.95	7.05	10.35	10.95	6.25	7.95	6.85	4.25	8.35	11.95	12.85	13.55	11.25	12.85	13.65	14.65	10.05	15.85	10.75	12.75	14.05	12.45	10.65	10.95	11.85	15.95	17.15	15.95	16.15	15.65	18.25	16.75
MEAN-T	4.44	6.2	4.05	4.43	6	2.24	1.93	5.53	3.58	3.45	4.43	7.36	7.14	3.79	3.56	3.18	0.95	0.53	0.95	3.77	4.49	3.94	4.76	2.21	1.39	3.88	9.75	10.25	8.25	6.56	10.84	11.53	11.43	6.13	9.75	8.46	9.71	9.93	9.55	7.73	7.11	9.1	11.92	14.94	13.92	12.34	11.78	9.51	11.31
2018
	2018-01-01	2018-01-02	2018-01-03	2018-01-04	2018-01-05	2018-01-06	2018-01-07	2018-01-08	2018-01-09	2018-01-10	2018-01-11	2018-01-12	2018-01-13	2018-01-14	2018-01-15	2018-01-16	2018-01-17	2018-01-18	2018-01-19	2018-01-20	2018-01-21	2018-01-22	2018-01-23	2018-01-24	2018-01-25	2018-01-26	2018-01-27	2018-01-28	2018-01-29	2018-01-30	2018-01-31	2018-02-01	2018-02-02	2018-02-03	2018-02-04	2018-02-05	2018-02-06	2018-02-07	2018-02-08	2018-02-09	2018-02-10	2018-02-11	2018-02-12	2018-02-13	2018-02-14	2018-02-15	2018-02-16	2018-02-17	2018-02-18
RAINFALL	0.49667599	0.060946594	0	0	0	0	0.780564407	67.80277303	0	0	0	0	0.713478258	3.722941822	0.164270604	0	0	0	0	0	0	0	0	0	1.795091298	62.92389556	0.205781605	0	0	0	1.240638098	0.743250318	0	0	1.910154248	18.00650399	4.407188189	0	0	0.29667599	0	0	0	0	0.757622585	0	0.573734168	1.160946594	0
MIN-T	5.971994851	4.519617813	3.564624443	7.310154248	6.491767289	11.35480704	12.18598157	8.254116356	7.8	5.522941822	5.077058178	4.458131049	1.110154248	7.53309607	6.126265832	8.768825466	3.85989796	1.623990456	2.717160217	1.580564407	7.632913851	12.7	7.696493771	5.020308496	9.564270604	4.473734168	4.879691504	3.702093156	5.600690684	3.1	1.7	4.1	2.56690393	1.622941822	-0.9	4.1	2.087212426	0.573734168	-0.3	-2.991430444	2.616111584	1.610866037	2.550792346	1.087212426	-1.960946594	3.610154248	3.752531663	6.2	4.6
MAX-T	12.87705818	11.7	18.97373417	18.69212113	18.08283978	14.98721243	18.5	15.81611158	12.42294182	13.37705818	13.39071865	13.03468076	12.97705818	10.16094659	12.1	16.34746834	14.1366023	14.49212113	15.34728612	12.16882547	16.10509092	17.84746834	17.08388842	13.4	12.92294182	12.32626583	10.44746834	14.41278757	14.2	13.70332401	10.92294182	9.422941822	9.2	9.745883644	11.66094659	7.212787574	7.4	7.1	8.2	8.983888416	8.139053406	10.1	9.459207277	7.847468337	10.42294182	11.94588364	19.9	11.96199523	12.56025591
MEAN-T	10.0868491	7.661313091	11.11471445	13.84073728	11.97359181	13.0751483	15.48402526	10.6280327	9.590856956	9.251189357	8.309527352	8.566078786	6.71349859	8.780752092	8.494657433	12.60189101	10.54276918	7.362015387	9.280807809	8.264325681	11.36713594	15.09515382	11.93534216	9.726197001	11.57304627	8.053309607	7.357582732	7.976492309	9.489769292	8.225759088	7.266550146	6.548071903	6.096882136	5.57359075	5.338299441	5.791278757	5.018879712	3.560769665	3.372539293	2.95381805	5.01243443	6.257393338	5.501877488	4.11667282	4.325813516	6.431312442	11.3334863	9.034938987	7.084309569
2019
	2019-01-01	2019-01-02	2019-01-03	2019-01-04	2019-01-05	2019-01-06	2019-01-07	2019-01-08	2019-01-09	2019-01-10	2019-01-11	2019-01-12	2019-01-13	2019-01-14	2019-01-15	2019-01-16	2019-01-17	2019-01-18	2019-01-19	2019-01-20	2019-01-21	2019-01-22	2019-01-23	2019-01-24	2019-01-25	2019-01-26	2019-01-27	2019-01-28	2019-01-29	2019-01-30	2019-01-31	2019-02-01	2019-02-02	2019-02-03	2019-02-04	2019-02-05	2019-02-06	2019-02-07	2019-02-08	2019-02-09	2019-02-10	2019-02-11	2019-02-12	2019-02-13	2019-02-14	2019-02-15	2019-02-16	2019-02-17	2019-02-18
RAINFALL	0	0	0	0	0	0	0	0	0	0	0	0	0	0	0	0.667776833	0	0	0.338004772	0.489845752	0	0	2.211048257	0	0	0	0	0	2.380564407	0	9.398281788	7.870785104	4.46008018	0	0	0	0	0	0	0	0	0	0	0	0	0	0	0	0
MIN-T	7.4	5.873734168	3.860946594	3.760946594	4.073734168	5.277058178	4.338004772	1.794042664	3.916111584	3.860946594	1.275473486	0.404372643	2.249207654	8.477058178	3.541328782	-0.4	5.41506295	2.187212426	-0.906830239	-0.531174534	-0.834680762	-0.273734168	-0.931174534	1.277058178	0.534680762	1.324526514	0.649207654	-0.754116356	0.938004772	1.526265832	1.577058178	6.534680762	5.189845752	5.2	3.4	1.880382187	0.660410536	-0.66357992	2.937468714	1.180382187	7.422941822	3.468825466	6	3.48826106	0.78493705	-1.234680762	-0.809999623	5.073734168	5.745883644
MAX-T	11.9	11.46357992	9.040638098	8.273734168	9.273734168	9.873734168	8.773734168	12.30841493	9.8	7.150792346	6.673734168	12.13468076	15.22803274	14.85079235	12.93468076	12.97705818	14.07373417	9.060946594	11.68984575	7.9	10.27373417	9.060946594	6.583888416	6.373734168	9.557622585	15.07373417	13.16094659	10.12452651	8.360946594	10.15079235	9.683888416	9.2	7.9	8.383888416	10.35079235	15.06357992	14.95079235	14.57373417	15.37373417	15.57373417	14.12294182	12.86094659	13.58652174	16.27373417	16.07705818	18	17.65079235	15.26094659	14.29667599
MEAN-T	9.158442447	8.324204706	5.80692069	5.400913321	6.682524479	7.131332363	6.119038181	7.027058827	6.86017628	4.972173856	3.641664764	6.340805698	8.39830326	11.16469834	8.331559901	6.484289237	9.385989796	5.112575326	4.528687558	4.751084493	4.764342194	3.760227538	2.374501723	3.841910524	4.225818624	6.441593585	6.619368883	4.870928783	4.645465241	5.421997165	5.832992669	7.959562736	6.62658553	6.513644767	5.7612275	7.269753829	7.187211777	6.606655009	7.732608361	7.199350661	10.36483412	8.397217296	9.005815864	8.597373417	7.144673306	6.797703469	7.194655084	8.890473708	9.186356293
[truncated: 317 more columns]

## Sheet: Number of days exceeding 30°C
	2016	2017	2018	2019
Flowering date (380 day degrees)	2016-06-04	2017-05-23	2018-05-22	2019-05-30
Veraison date (around 1100 day degrees)	2016-07-27	2017-07-13	2018-07-17	2019-07-19
Number of days exceending 30°C (in Max-T)	38	38	37	40
